# Supplementary material for: Impact of ‘HIV-related stigma-reduction workshops’ on knowledge and attitude of healthcare providers and students in Central India: a pre-test and post-test intervention study
Source: PubMed Central journal article supplement (PMC7201299; doi:10.1136/bmjopen-2019-033612), 2020-04-12
Supplement: bmjopen-2019-033612.draft_revisions.pdf [file bmjopen-2019-033612.draft_revisions.pdf]

# BMJ Open

BMJ Open is committed to open peer review. As part of this commitment we make the peer review history of every article we publish publicly available.

When an article is published we post the peer reviewers' comments and the authors' responses online. We also post the versions of the paper that were used during peer review. These are the versions that the peer review comments apply to.

The versions of the paper that follow are the versions that were submitted during the peer review process. They are not the versions of record or the final published versions. They should not be cited or distributed as the published version of this manuscript.

BMJ Open is an open access journal and the full, final, typeset and author-corrected version of record of the manuscript is available on our site with no access controls, subscription charges or pay-per-view fees (<http://bmjopen.bmj.com>).

If you have any questions on BMJ Open's open peer review process please email [info.bmjopen@bmj.com](mailto:info.bmjopen@bmj.com)

# BMJ Open

## Impact of 'HIV-related stigma-reduction workshops' on knowledge and attitude of healthcare providers and students in Central India: A pre- and post-test interventional study

|                               |                                                                                                                                                                                                                                                                                                                                                                          |
|-------------------------------|--------------------------------------------------------------------------------------------------------------------------------------------------------------------------------------------------------------------------------------------------------------------------------------------------------------------------------------------------------------------------|
| Journal:                      | <i>BMJ Open</i>                                                                                                                                                                                                                                                                                                                                                          |
| Manuscript ID                 | bmjopen-2019-033612                                                                                                                                                                                                                                                                                                                                                      |
| Article Type:                 | Research                                                                                                                                                                                                                                                                                                                                                                 |
| Date Submitted by the Author: | 13-Aug-2019                                                                                                                                                                                                                                                                                                                                                              |
| Complete List of Authors:     | Machowska, Anna; Karolinska Institute, Department of Public Health Sciences<br>Bamboria, Babu Lal; RD Gardi Medical College, Department of Medicine<br>Bercan, Courtney; Karolinska Institutet, Department of Public Health Sciences<br>Sharma, Megha; Karolinska Institutet, Department of Public Health Sciences; RD Gardi Medical College, Department of Pharmacology |
| Keywords:                     | People living with HIV/AIDS, Stigma and discrimination, Students of healthcare courses, Health Care Professionals, HIV-related stigma-reduction workshop                                                                                                                                                                                                                 |
|                               |                                                                                                                                                                                                                                                                                                                                                                          |

SCHOLARONE™  
Manuscripts

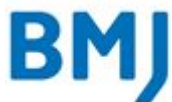

I, the Submitting Author has the right to grant and does grant on behalf of all authors of the Work (as defined in the below author licence), an exclusive licence and/or a non-exclusive licence for contributions from authors who are: i) UK Crown employees; ii) where BMJ has agreed a CC-BY licence shall apply, and/or iii) in accordance with the terms applicable for US Federal Government officers or employees acting as part of their official duties; on a worldwide, perpetual, irrevocable, royalty-free basis to BMJ Publishing Group Ltd ("BMJ") its licensees and where the relevant Journal is co-owned by BMJ to the co-owners of the Journal, to publish the Work in this journal and any other BMJ products and to exploit all rights, as set out in our [licence](#).

The Submitting Author accepts and understands that any supply made under these terms is made by BMJ to the Submitting Author unless you are acting as an employee on behalf of your employer or a postgraduate student of an affiliated institution which is paying any applicable article publishing charge ("APC") for Open Access articles. Where the Submitting Author wishes to make the Work available on an Open Access basis (and intends to pay the relevant APC), the terms of reuse of such Open Access shall be governed by a Creative Commons licence – details of these licences and which [Creative Commons](#) licence will apply to this Work are set out in our licence referred to above.

Other than as permitted in any relevant BMJ Author's Self Archiving Policies, I confirm this Work has not been accepted for publication elsewhere, is not being considered for publication elsewhere and does not duplicate material already published. I confirm all authors consent to publication of this Work and authorise the granting of this licence.

1 **Impact of ‘HIV-related stigma-reduction workshops’ on knowledge and attitude of**  
2 **healthcare providers and students in Central India: A pre- and post-test interventional study**

3 Anna Machowska<sup>1#</sup>, BL Bamboria<sup>2#</sup>, Courtney Bercan<sup>1</sup>, Megha Sharma<sup>1,3§</sup>

4 <sup>1</sup> Department of Public Health Sciences, Karolinska Institutet, Stockholm, Sweden

5 <sup>2</sup> Department of Medicine, Ruxmaniben Deepchand Gardi Medical College, Ujjain, India

6 <sup>3</sup> Department of Pharmacology, Ruxmaniben Deepchand Gardi Medical College, Ujjain, India

7  
8 §Corresponding author:

9 Dr. Megha Sharma

10 Researcher,

11 Department of Public Health Sciences, Karolinska Institutet, Stockholm, Sweden

12  
13 Associate Professor,

14 Department of Pharmacology, R.D. Gardi Medical College, Surasa, MP, India

15 e-mail: [megha.sharma@ki.se](mailto:megha.sharma@ki.se)

16  
17 # These authors have contributed equally to the work

18  
19 **E-mail addresses of authors:**

20 [Anna.machowska@ki.se](mailto:Anna.machowska@ki.se)

21 [drblbamboria53@gmail.com](mailto:drblbamboria53@gmail.com)

22 [courtney\\_bercan@hotmail.com](mailto:courtney_bercan@hotmail.com)

23 [megha.sharma@ki.se](mailto:megha.sharma@ki.se), [meghasharma27@rediffmail.com](mailto:meghasharma27@rediffmail.com)

1  
2  
3 **24 Abstract**  
4

5 **25 Introduction:** People living with human immunodeficiency virus (HIV) and acquired  
6 immunodeficiency syndrome (AIDS) experience stigma and discrimination throughout their life.  
7  
8 26 The consequences of stigma and discrimination are severe when enacted by healthcare providers  
9  
10 27 (HCPs) and result in delay or poor adherence to the treatment. Studies have demonstrated universal  
11  
12 28 stigma amongst HCPs, yet only a few have presented the effect of interventions on the knowledge  
13  
14 29 and attitude of practising- (doctors and nurses) and future-HCPs (students of healthcare courses).  
15  
16  
17  
18  
19

20 31 **Objectives:** The primary objective was to evaluate knowledge, attitude and infection risk  
21  
22 32 perceptions related to HIV/AIDS among practising- and future-HCPs in Central India. Secondly,  
23  
24 33 the impact of the 'HIV-related stigma-reduction workshop' using a pre- and post-intervention  
25  
26 34 study design was evaluated.  
27  
28  
29

30 35 **Settings and participants:** The study was conducted during January-August 2016 at two tertiary-  
31  
32 36 care hospitals and three colleges of healthcare courses in Ujjain district of Central India. Overall,  
33  
34 37 650 individuals; HCPs (clinicians-75, nurses-211), and students (medical-205, nursing-123 and  
35  
36 38 Diploma in Medical and Laboratory Technology [DMLT]-36); voluntarily participated in the  
37  
38 39 study.  
39  
40  
41  
42

43 40 **Intervention:** The interventional workshop contained in 3 sessions and included training in  
44  
45 41 epidemiology, transmission and treatment of HIV infection, rights of infected persons, duties of  
46  
47 42 HCPs, and use of standard precautions.  
48  
49

50  
51 43 **Results:** At pre-intervention, DMLT students had the lowest and clinicians the highest knowledge  
52  
53 44 scores (24% vs 45%). The stigmatised attitude reflected in all groups, lowest among clinicians  
54  
55 45 (21%) and highest among DMLT students (34%). Improvement in the post-intervention  
56  
57  
58  
59  
60

1  
2  
3 46 knowledge scores was highest in medical students (36%) and least among clinicians (16%). The  
4  
5 47 participants' attitude improved between 3% to 17% in all groups.  
6  
7

8  
9 48 **Conclusions:** Significant post-intervention improvements were seen in both knowledge and  
10  
11 49 attitude in all groups. Students had a higher tendency to improve than the HCPs. Further studies  
12  
13 50 are needed to conclude that this specific intervention can change long-term behaviour of HCPs.  
14  
15

## 16 17 51 **Article Summary**

### 18 19 52 **Strengths and limitations of this study**

- 20  
21 53 • The study demonstrate a positive effect of the 'HIV-related stigma-reduction workshop'  
22  
23 54 educational intervention on knowledge, attitude, and discrimination of HCPs and students  
24  
25 55 of healthcare courses, towards PLWHA.
- 26  
27 56 • The intervention used low-resources, and therefore could be adopted and scaled up to train  
28  
29 57 HCPs in other similar settings.
- 30  
31 58 • As the study was conducted at work places or educational institutes, the responses are  
32  
33 59 subjected to a social-desirability bias, and thus might result in underestimation of stigma  
34  
35 60 and discrimination among the participants.
- 36  
37 61 • The end-goal of any stigma-reduction intervention is to reduce stigmatizing behaviours,  
38  
39 62 but as these behaviours are difficult and complex to capture and quantify at the workplace,  
40  
41 63 we were restricted to capture attitudes as a proxy.
- 42  
43 64 • The post-intervention questionnaire was filled in immediately following the intervention.  
44  
45 65 Thus, the long-term effect cannot be claimed.  
46  
47  
48  
49  
50  
51  
52  
53  
54  
55  
56  
57  
58  
59  
60

## 68 Introduction

69 The human immunodeficiency virus (HIV) and acquired immunodeficiency syndrome (AIDS)  
70 epidemic is a global challenge. As per an estimation made at the end of 2017, 36.9 million people  
71 were either infected by HIV or were living with AIDS, globally. Of these, about 22 million people  
72 could access antiretroviral therapy (ART), and 940 000 people died from HIV-related illnesses (1,  
73 2). The United Nations' 90-90-90 targets launched in 2014 have become a central pillar of global  
74 efforts to end the HIV/AIDS epidemic. The aim is to diagnose 90% of all HIV-positive persons,  
75 provide ART for 90% of those diagnosed, and achieve viral suppression for 90% of those treated  
76 by 2020. The program estimates to result in 73% of people with HIV achieving viral suppression,  
77 a crucial step in ending the AIDS epidemic by 2030 (3). One key aspect of the HIV/AIDS epidemic  
78 that is significantly affected by culture and knowledge of HIV transmission is stigma, specifically  
79 HIV/AIDS-related stigma. HIV stigma can be described as a socially shared perception of the  
80 devalued status of PLWHA (4). The presence of stigma and discrimination against PLWHA at  
81 various societal levels fuels the HIV-epidemic, and the consequences are more severe if present  
82 among the healthcare providers (HCPs).

83 HCPs are the core and integral part of the healthcare delivery system. HCPs play a pivotal role in  
84 creating a positive environment for better health outcomes of PLWHA and preventing viral  
85 transmission (5). However, inadequate knowledge about the HIV infection epidemiology among  
86 HCPs gives rise to fear and misconceptions about transmission of the infection (6-8). Fear and  
87 misconceptions alter the attitude and enhance the development of stigma and discrimination  
88 towards PLWHA (9). Some of the major consequences are, delay in seeking healthcare, impaired  
89 timely diagnosis, unwillingness to disclose the HIV-status in the community and while seeking  
90 healthcare, and delay or non-compliance to the ART (5, 6). Undisclosed HIV status puts the society

1  
2  
3 91 at higher risk of infection transmission, contributes to increased morbidity and mortality of  
4  
5 92 PLWHA, increased healthcare costs and burden on the overall healthcare sector (10-12).  
6  
7  
8 93 Therefore, in addition to diagnosis and treatment, provision of discrimination- and stigma-free  
9  
10 94 healthcare is a prerequisite to achieve the sustainable development target to end the epidemic.

11  
12  
13 95 In 2016, with the prevalence of 2.1 million PLWHA, India ranked 3<sup>rd</sup> in the world, after South  
14  
15 96 Africa and Nigeria (13, 14). The prevalence of PLWHA varies state-wise the country. However,  
16  
17  
18 97 the threat of the spread of the infection is high throughout the country due to high inter-state and  
19  
20 98 inter-district migrations (15). Global organisations and governments of high infection risk  
21  
22 99 countries, including Indian, have prioritised stigma-reduction through various interventional  
23  
24  
25 100 programs (16). In India, the National AIDS Control Organization (NACO) advocates the  
26  
27 101 prohibition of social discrimination against PLWHA (14, 16). NACO has identified seven districts  
28  
29 102 of the state as high HIV-prevalence districts. Ujjain division is an administrative unit which  
30  
31  
32 103 includes four of these high-risk districts, i.e. Neemuech, Mandsour, Ujjain, and Ratlam (17, 18).  
33  
34 104 However, the available data from various parts of the country shows that PLWHAs have  
35  
36 105 experienced stigma and discrimination from the community and the HCPs (19, 20).

37  
38  
39 106 Educational interventions intended to improve knowledge about HIV/AIDS are effective to reduce  
40  
41 107 the stigma among HCPs and improved healthcare delivery (21-26). The stigma-reduction  
42  
43  
44 108 intervention studies, in general, are time-consuming and resource-intensive. Most of the  
45  
46  
47 109 interventional studies had mainly focused on nurses and nursing students and were not focused on  
48  
49 110 clinicians and students of the healthcare courses (11, 23-25). The students of healthcare courses  
50  
51 111 such as medical, laboratory technician and nursing courses, are future HCPs. It is, therefore,  
52  
53 112 important to develop appropriate interventions to improve the knowledge and reduce HIV-related  
54  
55  
56 113 stigma, targeting both the practising (clinicians and nurses) and future (the students) HCPs (27).



1  
2  
3 114 However, little is known about HIV/AIDS-related knowledge, attitudes and perceived infection  
4  
5 115 risk of the practising and future HCPs from India.  
6  
7

## 8 9 116 **Objectives**

10  
11  
12 117 To evaluate the knowledge and attitude and infection risk perceptions related to HIV/AIDS, among  
13  
14 118 the HCPs, and the students of healthcare courses, i.e. medical, laboratory technician and nursing  
15  
16 119 in Ujjain district in Central India. Further, to assess and compare the impact of the ‘HIV-related  
17  
18 120 stigma-reduction workshop’ intervention on the participant groups using a pre-and post-  
19  
20 121 intervention study design.  
21  
22

## 23 24 122 **Methods**

25  
26  
27  
28 123 This interventional study was conducted between January 2016 and August 2016 at three colleges  
29  
30 124 of healthcare courses and two tertiary-care hospitals in Ujjain district in Madhya Pradesh state in  
31  
32 125 India. One of the hospitals is located in a rural area and is associated with all three colleges included  
33  
34 126 in the study. One of the two study hospitals is associated with a medical college, a nursing college  
35  
36 127 and a DMLT college. This hospital is referred as teaching hospital (TH), and the students of  
37  
38 128 Bachelor of Medicine, Bachelor of Surgery (MBBS), are referred as medical students in the present  
39  
40 129 communication. An ART centre is located at the TH with specialized healthcare facilities for the  
41  
42 130 PLWHA. Another participating hospital is located in Ujjain city, referred to as a non-teaching  
43  
44 131 hospital (NTH).  
45  
46  
47  
48

## 49 132 **Participants**

50  
51  
52  
53  
54  
55  
56  
57  
58  
59  
60

1  
2  
3 133 The participants were practicing HCPs clinicians and nurses, and future HCPs, i.e. students of  
4  
5 134 medical, nursing and Diploma in Medical and Laboratory Technology [DMLT] courses, enrolled  
6  
7  
8 135 in respective institutes in Ujjain district of Central India.  
9

### 10 136 **Sampling strategy**

11  
12  
13 137 All groups of the HCPs and students were invited to participate in the workshop through various  
14  
15 138 means such as leaflets posted at the notice boards, announcements during lectures or meetings.  
16  
17 139 The leaflets were written in Hindi and English to offer equal chances for all potential participants  
18  
19 140 to learn about and attend the workshop to enhance their HIV/AIDS-related knowledge and ways  
20  
21 141 to stay protected at the workplace. The workshops were conducted at respective colleges and  
22  
23 142 hospitals for providing ease to participate.  
24  
25  
26  
27

### 28 143 **Inclusion and exclusion criteria**

29  
30  
31 144 Participation was voluntary, and the participant could leave the session at any time without  
32  
33 145 experiencing any repercussions. Participants who could not attend or complete both pre- and post-  
34  
35 146 workshop sessions were not included in the analysis (Figure 1).  
36  
37  
38

### 39 147 **Figure 1 Inclusion and exclusion criteria of the study participants (make in 1,200 dpi)**

### 40 148 **Intervention**

#### 41 149 *Structure of the workshops*

42  
43  
44  
45  
46 150 All workshops were conducted by the same facilitators: a clinician and an officer-in-charge of the  
47  
48 151 ART centre at the TH and the leader of hospital infection prevention and control team at the TH  
49  
50  
51 152 and the NTH. In total, 13 workshops were conducted. Participants were divided into smaller  
52  
53  
54  
55  
56  
57  
58  
59  
60

1  
2  
3 153 subgroups as follows: clinicians (2 groups), nurses (5 groups), medical students (3 groups), nursing  
4  
5 154 students (2 groups) and DMLT students (1 group) to ensure that they feel comfortable in the  
6  
7  
8 155 learning environment.  
9

### 10 11 156 *Content of the workshops*

12  
13  
14 157 The workshop was 2 hours long and was divided into three sessions: the 1<sup>st</sup> session consisted of  
15  
16 158 an animated video demonstrating the HIV infection epidemiology, mechanism of viral  
17  
18  
19 159 transmission, diagnostic testing, treatment options, mechanism of action of ART drugs and ethical  
20  
21 160 issues related to PLWHA and ART. This was followed by 2<sup>nd</sup> session with a powerpoint  
22  
23 161 presentation focusing the topics such as rights of PLWHA, duties of HCPs and predictable  
24  
25 162 consequences due to stigma and discrimination against PLWHAs. The 3<sup>rd</sup> session was more  
26  
27 163 interactive and dynamic. In this part, information about universal precautions and preventive  
28  
29 164 measures for infection prevention and control was provided, describing the importance of the use  
30  
31 165 of standard precautions, including hand hygiene in daily routine. It was explained how and when  
32  
33 166 to use gowns, gloves, face shields, masks and goggles, availability of post-exposure prophylaxis  
34  
35 167 (PEP) in the study settings and use of in-house prepared alcohol-based hand rub, i.e. ‘Micro  
36  
37 168 *Kavach*’ (28). This was followed by the demonstration and practice of the WHO recommended  
38  
39 169 hand hygiene techniques using ‘Micro *Kavach*’ (28). A time period of 15 to 20 minutes was  
40  
41 170 assigned for open discussion that was followed by filling-up the post-intervention questionnaires.  
42  
43  
44  
45  
46

### 47 171 **Data collection and analysis**

48  
49  
50 172 The context-specific pre- and post-intervention questionnaires were developed locally and used as  
51  
52 173 data collection tools. The questionnaires were pre-tested in each potential participant groups and  
53  
54 174 modified based on the received feedback. Questionnaires were formatted in both English and  
55  
56  
57

1  
2  
3 175 Hindi, divided into following sections: (1) participants' demographic information, (2) experiences,  
4  
5 176 (3) HIV/AIDS-related knowledge, (4) attitudes towards PLWHA, (5) risk perception and  
6  
7 177 willingness to provide care to PLWHA and patients with Hepatitis B.  
8  
9

10  
11 178 The participants were asked to fill in the questionnaire once before the workshop (pre-intervention)  
12  
13 179 and once 20 minutes after the workshop (post-intervention).  
14  
15

16  
17 180 The authors scored the responses related to the knowledge and attitude questions. Each correct  
18  
19 181 response in the knowledge section received a score of one, and each incorrect response received a  
20  
21 182 score of zero. Scores of each individual were added and converted to the percentage of correct  
22  
23 183 responses pre and post-intervention. Based on the previous research in this field levels of  
24  
25 184 knowledge were categorised into "low" for participants who scored 50% and below, "moderate"  
26  
27 185 for those who scored between 51% and 74%, and "high" for those who scored 75% and above  
28  
29 186 (29).  
30  
31  
32

33  
34 187 The responses to the questions related to the participants' attitude towards PLWHA were classified  
35  
36 188 into three categories: positive (non-stigmatizing), unsure and negative (30). A positive response  
37  
38 189 was given a score of one and the responses where the participants were unsure or, where the  
39  
40 190 responses indicated negative attitude including fear, stigma, or intent to discriminate PLWHA,  
41  
42 191 were given a score of zero (31). Scores of the participants were added and converted to the  
43  
44 192 percentage of correct responses pre- and post-intervention. Question for which the missing data  
45  
46 193 was higher than 50% were excluded from the analysis.  
47  
48  
49

50  
51 194 Risk perception questions were categorical and dichotomised according to the outcome of interest  
52  
53 195 for example (a) I am willing or not willing to care for a patient, or (b) I am at high risk or not at  
54  
55 196 high risk of HIV exposure at the workplace.  
56  
57

## 197 **Statistical analysis**

198 The data on demographic and basic HIV-related information is presented as mean and standard  
199 deviations for continuous variables and as percentages and frequencies for categorical variables.  
200 The knowledge, attitudes and work environment variables are presented as median with  
201 interquartile range (IQR). The difference between the pre- and post-intervention scores were  
202 analysed using a Wilcoxon signed-rank test for continuous variables and McNemar's test for  
203 categorical variables. The score difference was calculated by subtracting the pre-intervention  
204 (baseline) score from the post-intervention score and represents the percentage unit increase or  
205 decrease in relation to the baseline score. As these scores were not normally distributed, a Kruskal-  
206 Wallis test was conducted to determine a statistically significant difference among the participant  
207 groups in pre-intervention and post-intervention scores as well as the difference of scores. Post-  
208 hoc Dunn's tests were conducted to evaluate the relationship between the groups. The statistical  
209 significance was set at the level of  $p < 0.05$ . Data collected in the questionnaires were entered using  
210 Epidata software (version 3.1) and Microsoft Excel. Statistical analysis was performed using the  
211 Statistical Package for the Social Sciences (SPSS and STATA) software.

## 212 **Results**

### 213 **Baseline characteristics**

214 A total of 920 invited persons, 746 participants (81%) voluntarily participated in the study. Out of  
215 746 participants, 650 attended all intervention sessions and filled-in both pre- and post-intervention  
216 questionnaires. Of 650 participants, 56% were students, and 44% were practising HCPs. Thus, the  
217 data of 650 participants were included in the analysis (Figure 1).

### 218 **Figure 2 Inclusion and exclusion criteria of the study participants**

219

220 The mean age of the participants was 23 years, the majority were of the Hindu faith, and 56% were  
 221 males (Table 1). The proportion of participants who had received HIV/AIDS-related training  
 222 previously, varied from 4% in the clinician group to 78% in the DMLT student group. Only 2% of  
 223 medical students stated that they had worked with PLWHA before. A high proportion of  
 224 participants in each group reported an experience of accidental exposure to HIV or PLWHA. A  
 225 range of 9% to 20% of the participants admitted discriminating against PLWHA at workplaces.  
 226 Six (3%) of medical students and up to 11% of DMLT students admitted that they had refused to  
 227 provide care for PLWHA during their scheduled clinical visits. A range of 17% to 28% of  
 228 participants thought that their colleagues discriminate against PLWHA (Table 1).

230 **Table 1 Baseline demographic information (Part A) and experiences (Part B) of the**  
 231 **participants**

|                                                                             | Clinicians<br>(n=75) | Nurses<br>(n=211) | Medical students<br>(n=205) | Nursing students<br>(n=123) | DMLT students<br>(n=36) |
|-----------------------------------------------------------------------------|----------------------|-------------------|-----------------------------|-----------------------------|-------------------------|
| <b>Part A: Baseline demographic information</b>                             |                      |                   |                             |                             |                         |
| Age, mean (SD)                                                              | 28 (4)               | 25 (6)            | 20 (1)                      | 21 (3)                      | 20 (2)                  |
| <b>Sex, n (%)</b>                                                           |                      |                   |                             |                             |                         |
| Male                                                                        | 30 (40)              | 148 (71)          | 109 (53)                    | 51 (42)                     | 28 (78)                 |
| Female                                                                      | 45 (60)              | 63 (30)           | 96 (47)                     | 72 (59)                     | 8 (22)                  |
| Married, n (%)                                                              | 21 (28)              | 70 (33)           | -                           | 11 (9)                      | 35 (97)                 |
| <b>Religion, n (%)</b>                                                      |                      |                   |                             |                             |                         |
| Hindu                                                                       | 62 (83)              | 192 (91)          | 183 (89)                    | 120 (98)                    | 31                      |
| Muslim                                                                      | 2 (3)                | 5 (2)             | 6 (3)                       | 3 (2.4)                     | 4                       |
| Christian                                                                   | 2 (3)                | 10 (5)            | 1 (0.5)                     | -                           | -                       |
| Other                                                                       | 9 (12)               | 4 (2)             | 15 (7)                      | -                           | 2                       |
| Have you ever attended any HIV/AIDS related training?                       | 3 (4)                | 39 (18)           | 63 (31)                     | 28 (23)                     | 28 (78)                 |
| <b>Part B: Experiences of participants</b>                                  |                      |                   |                             |                             |                         |
| Have you ever cared for PLWHA before?<br>n (%)                              | 37 (49)              | 121 (57)          | 4 (2)                       | 88 (72)                     | 18 (50)                 |
| If yes, how many times?                                                     |                      |                   |                             |                             |                         |
| < 10                                                                        | 29 (78)              | 59 (49)           | 2 (50)                      | 61 (69)                     | 5 (28)                  |
| < 50                                                                        | 2 (5)                | 27 (22)           | -                           | 14 (20)                     | 8 (44)                  |
| > 100                                                                       | 1 (3)                | 19 (16)           | -                           | -                           | 5 (28)                  |
| Cannot recall the numbers                                                   | -                    | 16 (13)           | 2 (50)                      | 13 (15)                     | -                       |
| §Have you ever had an accidental exposure with body fluid of PLWHA at work? | §4 (11)              | §24 (20)          | §3 (75)                     | §14 (16)                    | §1 (6)                  |
| Have you ever refused to care for PLWHA?                                    | 6 (8)                | 18 (9)            | 6 (3)                       | 6 (5)                       | 4 (11)                  |
| Have you discriminated against PLWHA at the workplace?                      | 7 (9)                | 42 (20)           | 22 (11)                     | 13 (11)                     | 5 (19)                  |

|    |                                                                                   |         |          |          |          |         |
|----|-----------------------------------------------------------------------------------|---------|----------|----------|----------|---------|
| 1  |                                                                                   |         |          |          |          |         |
| 2  |                                                                                   |         |          |          |          |         |
| 3  |                                                                                   |         |          |          |          |         |
| 4  | <b>Do you think your colleagues discriminate against PLWHA?</b>                   | 21 (28) | 45 (21)  | 51 (25)  | 28 (23)  | 6 (17)  |
| 5  | <b>Is your family aware that you ought to care for PLWHA patients as well</b>     | 49 (65) | 134 (64) | 127 (62) | 100 (81) | 16 (72) |
| 6  | <b>Is there any family pressure regarding caring for PLWHAs</b>                   | 15 (20) | 46 (22)  | 16 (8)   | 15 (12)  | 8 (22)  |
| 7  | <b>Do you have any friend or family who is identified as PLWHA?</b>               | 3 (4)   | 16 (8)   | 3 (2)    | 5 (4)    | 2 (6)   |
| 8  | <b>There is enough equipment to maintain universal precautions at work place.</b> | 20 (27) | 126 (60) | 79 (39)  | 84 (68)  | 19 (53) |
| 9  | <b>Have you ever had any accidental exposure to HIV through PLWHA at work?</b>    | 4 (5)   | 24 (11)  | 3 (1)    | 14 (11)  | 1 (3)   |
| 10 |                                                                                   |         |          |          |          |         |
| 11 |                                                                                   |         |          |          |          |         |
| 12 |                                                                                   |         |          |          |          |         |
| 13 |                                                                                   |         |          |          |          |         |

232 DMLT= Students of Diploma in Medical and Laboratory Technology; Medical students= Students of Bachelor of  
 233 Medicine, Bachelor of Surgery; PLWHA= people living with HIV/AIDS

234 The boxes where totals do not add up to 100%, the remaining percentage of the participants did not respond to that  
 235 question. §Proportion calculated from patients who confirmed that they have ever cared for PLWHA  
 236

### 237 **Impact of the intervention on knowledge scores**

238 Pre-intervention knowledge score, presented as the percentage of correct responses, showed the  
 239 low overall level of knowledge with the poorest in DMLT students (22%) and the highest among  
 240 the clinicians (45%, Table 2). Post-intervention knowledge scores ranged from 48% in the nurses'  
 241 group to 64% in the medical students' group. The post-intervention knowledge scores were  
 242 significantly higher than pre-intervention knowledge scores ( $p < 0.001$ , Table 2), and almost all  
 243 groups reached a moderate level of knowledge. The difference between knowledge scores of all  
 244 study groups was statistically significant ( $p < 0.001$ ). The knowledge scores of the students of both  
 245 medical and nursing courses improved more than their respective practising HCPs. Pairwise  
 246 comparison showed that at the pre-intervention stage, the clinicians had the highest knowledge  
 247 than the rest of the groups ( $p < 0.001$ , Table 3). However, in the post-intervention stage, the medical  
 248 students presented higher knowledge than the clinicians while the knowledge of nurses was lowest  
 249 in the sequence.

### 250 **Impact of the intervention on attitude**

251 Evidence of stigmatised attitude was observed among all responder groups. The lowest level of  
 252 stigmatising attitudes at pre-intervention was found in the clinicians' group, where 79% responded

253 to the questions without stigma. On the other hand, in the DMLT students' group, only 66% of  
 254 responses presented a non-stigmatising attitude (Table 2). In post-intervention, the percentages of  
 255 non-stigmatising responses were higher, ranging from 79% (lowest) among the nurses to 84% in  
 256 the medical students' group. The attitude improved significantly across all groups, with 3% in the  
 257 clinician group and 17% in the DMLT students' group ( $p < 0.001$ ). Overall, the intervention resulted  
 258 in an improvement in stigma levels to 21%, as shown in the nurses' group. Pairwise comparison  
 259 showed that medical students had the highest improvement in their attitude compared to the nurses,  
 260 nursing students, as well as the clinicians (Table 4).

261 **Table 2. Pre- and post-intervention scores of knowledge and attitude among the participant**  
 262 **groups**

| <b>Knowledge</b>                              |                                          |                                       |                                                 |                                                 |                                             |
|-----------------------------------------------|------------------------------------------|---------------------------------------|-------------------------------------------------|-------------------------------------------------|---------------------------------------------|
|                                               | <b>Clinicians<br/>(n=75)<br/>% (IQR)</b> | <b>Nurses<br/>(n=211)<br/>% (IQR)</b> | <b>Medical students<br/>(n=205)<br/>% (IQR)</b> | <b>Nursing students<br/>(n=123)<br/>% (IQR)</b> | <b>DMLT<br/>students (n=36)<br/>% (IQR)</b> |
| <b>Percentage of correct responses</b>        |                                          |                                       |                                                 |                                                 |                                             |
| <b>Pre-Intervention, median (IQR)</b>         | 45 (15)                                  | 30 (19)                               | 29 (14)                                         | 30 (19)                                         | 22 (14)                                     |
| <b>Post-Intervention, median (IQR)</b>        | 59 (14)                                  | 48 (26)                               | 64 (21)                                         | 59 (26)                                         | 52 (17)                                     |
| <b>Difference</b>                             | 14*                                      | 18*                                   | 35*                                             | 29*                                             | 30*                                         |
| <b>Attitude</b>                               |                                          |                                       |                                                 |                                                 |                                             |
| <b>Percentage of responses without stigma</b> |                                          |                                       |                                                 |                                                 |                                             |
| <b>Pre-Intervention, median (IQR)</b>         | 79 (18)                                  | 74 (15)                               | 74 (18)                                         | 76 (12)                                         | 66 (35)                                     |
| <b>Post-Intervention, median (IQR)</b>        | 82 (11)                                  | 79 (12)                               | 84 (16)                                         | 82 (9)                                          | 83 (14)                                     |
| <b>Difference</b>                             | 3*                                       | 5*                                    | 10*                                             | 5*                                              | 17*                                         |

\*Statistically significant differences with significance level  $p < 0.05$ .

DMLT= Students of Diploma in Medical and Laboratory Technology; IQR= Interquartile range; Medical students= Students of Bachelor of Medicine, Bachelor of Surgery

263  
 264  
 265  
 266  
 267  
 268 **Table 3. Pre- and post-intervention pairwise comparison of knowledge between the**  
 269 **participant groups**

| <b>Groups Compared</b> | <b>Pre-Intervention<br/>Adjusted significance</b> | <b>Post-Intervention<br/>Adjusted<br/>significance</b> | <b>Pre- and Post-Intervention<br/>Adjusted significance</b> |
|------------------------|---------------------------------------------------|--------------------------------------------------------|-------------------------------------------------------------|
|                        |                                                   |                                                        |                                                             |



|                                     |         |         |         |
|-------------------------------------|---------|---------|---------|
| DMLT students- Nursing students     | <0.05*  | 0.068   | 1.000   |
| DMLT students - Medical students    | <0.01*  | <0.001* | 0.629   |
| DMLT students -Clinicians           | <0.001* | 0.116   | <0.001* |
| DMLT students - Nurses              | 0.059   | 1.000   | 0.234   |
| Medical students - Clinicians       | <0.001* | 0.051   | <0.001* |
| Nursing students - Clinicians       | <0.001* | 1.000   | <0.001* |
| Nursing students – Medical students | 1.000   | <0.05*  | 0.934   |
| Nurses- Nursing students            | 1.000   | <0.001* | <0.001* |
| Nurses- Clinicians                  | <0.001* | <0.001* | <0.05*  |
| Nurses– Medical students            | 1.000   | <0.001* | <0.001* |

\*Statistically significant differences with significance level  $p < 0.05$ .

Significance values have been adjusted by the Bonferroni correction for multiple tests. DMLT= Students of Diploma in Medical and Laboratory Technology; Medical students= Students of Bachelor of Medicine, Bachelor of Surgery

**Table 4. Pre- and post-intervention pairwise comparison of attitudes between the participant groups**

| Groups Compared                     | Pre-Intervention Adjusted significance | Post-Intervention Adjusted significance | Pre- and Post-Intervention Adjusted significance |
|-------------------------------------|----------------------------------------|-----------------------------------------|--------------------------------------------------|
| DMLT students - Nursing students    | 0.184                                  | 1.000                                   | 0.147                                            |
| DMLT students - Medical students    | 0.479                                  | 0.614                                   | 1.000                                            |
| DMLT students -Clinicians           | <0.01*                                 | 1.000                                   | 0.134                                            |
| DMLT students - Nurses              | 0.627                                  | 1.000                                   | 0.439                                            |
| Medical students - Clinicians       | <0.05*                                 | 1.000                                   | <0.01*                                           |
| Nursing students - Clinicians       | 0.252                                  | 1.000                                   | 1.000                                            |
| Nursing students – Medical students | 1.000                                  | 0.173                                   | <0.01*                                           |
| Nurses- Nursing students            | 1.000                                  | 0.614                                   | 1.000                                            |
| Nurses- Clinicians                  | <0.05*                                 | 0.092                                   | 1.000                                            |
| Nurses– Medical students            | 1.000                                  | <0.001*                                 | <0.05*                                           |

\*Statistically significant differences with significance level  $p < 0.05$ . Significance values have been adjusted by the Bonferroni correction for multiple tests.

DMLT= Students of Diploma in Medical and Laboratory Technology; Medical students= Students of Bachelor of Medicine, Bachelor of Surgery

**Table 5. Risk perception reported by the participants in pre- and post-intervention questionnaires: Proportion of the participants who responded as “Yes” to the questions asked**

| Questions                                                    | Time point        | Nurses<br>(n=211)<br>n (%) | Clinicians<br>(n=75)<br>n (%) | Nursing students<br>(n=123)<br>n (%) | Medical students<br>(n=205)<br>n (%) | DMLT students<br>(n=36)<br>n (%) |
|--------------------------------------------------------------|-------------------|----------------------------|-------------------------------|--------------------------------------|--------------------------------------|----------------------------------|
| Do you think you are at high risk for HIV/AIDS at work?      | Pre-intervention  | 71 (34)                    | 50 (67)                       | 39 (32)                              | 61 (30)                              | 22 (61)                          |
|                                                              | Post-intervention | 81 (38)                    | 51 (68)                       | 86 (70)*                             | 82 (40)*                             | 17(47)                           |
| Are you willing to care for-<br>a) Patients with hepatitis B | Pre-intervention  | 174 (83)                   | 64 (85)                       | 112 (91)                             | 155 (76)                             | 28 (78)                          |
|                                                              | Post-intervention | 192 (91)*                  | 65(87)                        | 118 (96)                             | 196 (96)*                            | 32 (89)                          |
| b) PLWHA§                                                    | Pre-intervention  | 151 (72)                   | 65 (87)                       | 114 (93)                             | 179 (87)                             | 34 (94)                          |
|                                                              | Post-intervention | 175 (83)*                  | 66 (88)                       | 110 (89)                             | 183 (89)                             | 30 (83)                          |

286 \*Statistically significant differences with significance level  $p < 0.05$ . DMLT= Students of Diploma in Medical and  
 287 Laboratory Technology; Medical students= Students of Bachelor of Medicine, Bachelor of Surgery; PLWHA= People  
 288 living with HIV/AIDS. §The question was also classified as an attitude question.

289

## 290 **Impact of the intervention on infection risk perception**

291 Thirty per cent of medical students and 67% of the clinicians perceived themselves to be at high  
 292 risk of HIV infection in their workplace at the pre-intervention stage. Willingness to care for  
 293 PLWHA was relatively high at the pre-intervention, ranging from 72% among the nurses to 94%  
 294 among the DMLT student group. The proportion of participants who were willing to care for  
 295 people living with Hepatitis B was similar to those willing to care for PLWHA.

296 After the workshop, the medical and nursing student reported a significant increase in awareness  
 297 of risk perception of HIV infection compared to their statements at pre-intervention. There was a  
 298 significant increase in post-intervention willingness to care for PLWHA in the nursing group, and  
 299 a non-significant decrease in the DMLT and nursing students' group (Table 5).

300

## 301 **Discussion**

302 The present study evaluates the effect of 'HIV-related stigma-reduction workshops' and showed  
 303 that there was a significant improvement in HIV/AIDS-related knowledge in all groups who  
 304 participated in the intervention irrespective of their inadequate baseline knowledge. Our study  
 305 highlights that stigmatising attitudes are widespread among practising HCPs and students of

1  
2  
3 306 various healthcare courses. However, this stigmatising attitude and discrimination to provide  
4  
5 307 medical care to PLWHA reduced significantly among the participants after the intervention. The  
6  
7  
8 308 student groups showed more receptiveness to improve their knowledge and attitudes towards  
9  
10 309 PLWHA than the practising HCPs.

### 13 310 *Knowledge*

16  
17 311 Overall, the study participants had inadequate HIV/AIDS-related knowledge, and the clinicians  
18  
19 312 had the highest pre-intervention knowledge score among all groups. The low level of knowledge  
20  
21 313 presented in our study is comparable with results from a cross-sectional survey conducted among  
22  
23 314 consultants, residents, medical students, laboratory technicians, and nurses, in Uttarakhand, India  
24  
25 315 (32). In this study, the clinicians had better knowledge than the rest of the groups, while the overall  
26  
27  
28 316 knowledge was not complete.

31  
32 317 The implication of acquired knowledge and attitudes are complex, but theories suggest that  
33  
34 318 knowledge is associated with baseline beliefs and attitudes and depends on the readiness of the  
35  
36 319 learners and their willingness to integrate the change into their behaviour (33, 34). Our study  
37  
38 320 showed the lowest increase in post-intervention knowledge scores among clinicians and the  
39  
40  
41 321 highest increase among the student groups. This could be due to several factors. Firstly, clinicians  
42  
43 322 showed adequate knowledge at pre-intervention, thus had less scope to improve their knowledge  
44  
45 323 at post-intervention. Secondly, as per the educational theory; the recognition of the gap in  
46  
47 324 knowledge, skills, or the need for behaviour change is essential for the desired change (33, 34).  
48  
49 325 The student groups, being in the learning phase of life, may have been more receptive to the  
50  
51  
52 326 training from the beginning and, thus improved more than the rest of the groups (33, 34).  
53  
54  
55  
56  
57  
58  
59  
60

1  
2  
3 327 In our study, the overall knowledge scores increased substantially after intervention in all groups  
4  
5 328 ranging, from 14% in clinicians to 35% in the medical students' group. Two single centre studies  
6  
7 329 conducted among nursing students in Bengaluru and nurses in Delhi, India evaluated the effect of  
8  
9 330 a brief stigma-reduction curriculum and educational intervention on HIV knowledge (23, 25). In  
10  
11 331 Bengaluru, the intervention was divided into two sessions of 1-hour each while in Delhi; it was a  
12  
13 332 2-days training program. The educational intervention delivered showed significant improvement  
14  
15 333 in knowledge scores in both settings. An increase of 9% post-intervention knowledge in Bengaluru  
16  
17 334 and 22% in Delhi was presented.

18  
19  
20  
21  
22 335 Although, in both studies, the participants attended two educational sessions, contrary to our single  
23  
24 336 workshop; the improvement in our study was higher. Therefore, it could be inferred that the  
25  
26 337 number and duration of the educational workshops do not correspond to improve the knowledge.

### 30 338 *Attitude*

31  
32  
33  
34 339 The percentage of non-stigmatizing responses ranged from 66% in the DMLT students to 79%  
35  
36 340 among the clinicians. Although the presence of stigma and discrimination was visible in the pre-  
37  
38 341 intervention attitude scores across all participant groups, the results are comparable to the  
39  
40 342 previously mentioned cross-sectional study by *Doda et al.* in Uttarakhand, India where the median  
41  
42 343 of positive responses ranged from 69% in postgraduate residents to 92% in consultants (32).

43  
44  
45  
46 344 Professional experience in working with PLWHA is a predictor of more positive attitudes towards  
47  
48 345 PLWHA (14,27). The higher levels of stigmatising attitudes found among participants (students)  
49  
50 346 in our study could be due to incomplete or inadequate knowledge, and also relatively less  
51  
52 347 experience of working with PLWHA.

1  
2  
3 348 One of the primary outcomes of our workshops was the reduction of negative attitudes ranging  
4  
5 349 from 3% in clinicians to 17% in DMLT students. Our results are comparable with a study from  
6  
7 350 China among clinicians, nurses, and laboratory technicians (35) which showed 13% and 22%  
8  
9 351 reduction in stigmatising attitudes at 6 and 12 months respectively after the intervention. On the  
10  
11 352 other hand, the reduction presented in our study is lower than the average reduction shown in a  
12  
13 353 study from Pune, India (33%). The Pune based study examined the impact of a 4-day long  
14  
15 354 HIV/AIDS health education program on the knowledge and positive attitudes toward caring for  
16  
17 355 HIV-infected patients of nurses (24).  
18  
19  
20  
21

### 22 356 *Risk perception*

23  
24  
25  
26 357 Another highlight of our study was willingness shown by the majority of HCPs and students, to  
27  
28 358 care for PLWHA, ranging from 72% to 94%, at the pre-intervention stage. Our findings are in line  
29  
30 359 with a study conducted in India by *Kermode et al.* showing a relatively high willingness of HCPs  
31  
32 360 to care for PLWHA in spite of the presence of the stigmatising attitudes (7). However, our results  
33  
34 361 differ from the studies conducted in Russia, showing that only 20% of HCPs were willing to care  
35  
36 362 for PLWHA (20%) (36).  
37  
38  
39

40  
41 363 Medical and nursing students significantly improved their awareness of being at risk for  
42  
43 364 HIV/AIDS at work. The willingness of the participants to change behaviour might have influenced  
44  
45 365 this improvement. There is a lack of studies that had assessed the pre- and post-intervention risk  
46  
47 366 perception among HCPs. There was an interplay between the knowledge of risks and universal  
48  
49 367 precautions in our study, actual risk (due to the prevalence of HIV and job description), the  
50  
51 368 environmental barriers and lack of accessibility of protective equipment. This interplay point  
52  
53 369 towards a need for structural changes at the workplace in conjunction with customised educational  
54  
55  
56  
57  
58  
59

1  
2  
3 370 interventions to reduce risk perception (6, 7). Further studies are needed to determine the factors  
4  
5 371 affecting willingness among HCPs to care for PLWHA.  
6  
7

## 8 9 372 **Conclusions**

10  
11  
12 373 Combating stigma is a key priority to achieve success in epidemic control and providing quality  
13  
14 374 care to PLWHA. The findings from this study show that the 'HIV-related stigma-reduction  
15  
16 375 workshops' - a brief and relatively low resource intervention successfully increased knowledge  
17  
18 376 and reduced stigma in both HCPs and students.

19  
20  
21  
22 377 We, therefore, recommend repetitive conduction of such contextualized workshops at healthcare  
23  
24 378 facilities. Attention must be drawn to interventions focusing on stigma-reduction that can be scaled  
25  
26 379 up and transferred to multiple HCPs groups, including both practicing- and future-HCPs. We also  
27  
28 380 recommend to conduct similar contextualized workshops in other settings to explore sustainability  
29  
30 381 and evaluate the impact in those settings. Incorporate more practical issues effectively in the  
31  
32 382 teaching curricula of all healthcare courses, is of high importance. Moreover, the inclusion of the  
33  
34 383 qualitative component, the use of extended follow-up and adding behavioural assessment in future  
35  
36 384 studies is recommended to understand participants' attitudes and willingness to change the  
37  
38 385 stigmatising behaviour for PLWHA.  
39  
40  
41  
42  
43

## 44 386 **Acknowledgements**

45  
46  
47 387 We thank all the study participants, the management of the hospitals and colleges for facilitating  
48  
49 388 and supporting the study. We are thankful to Mr Amit Pawar for assisting in data collection and  
50  
51 389 data management.  
52  
53

## 54 55 390 **Footnotes**

1  
2  
3 391 **Author contributions**  
4  
5

6 392 MS and BLB perceived the study. MS and BLB designed and performed the questionnaire and the  
7  
8 393 content of the interventions, and collected the pre-and post-intervention data. AM, CB and MS  
9  
10 394 performed the analysis. AM and MS drafted the article. AM, MS, BLB and CB gave critical  
11  
12 395 comments to modify the manuscript. All authors gave final approval to the present version for  
13  
14 396 publication.  
15  
16  
17

18  
19 397 **Funding**  
20  
21

22 398 This work was supported by Swedish Research Council grant number 2017-01327.  
23  
24

25 399 **Competing interests**  
26  
27

28  
29 400 Authors have no conflicts of interests to declare.  
30  
31

32 401 **Ethical considerations**  
33  
34

35 402 Ethical approval was granted by the local ethics committee (311/17-07-2013 and 249/23-01-2013).  
36  
37 403 Verbal and written consents were obtained from each participant before the study. Participants  
38  
39 404 were assured by the researchers for full confidentiality. Participants were encouraged to respond  
40  
41 405 to the questionnaires fearlessly and were ensured for no repercussions based on the responses.  
42  
43  
44

45 406  
46  
47 407 **A data sharing statement**  
48

49 408 The data are not publicly available at present because it contains information that could  
50  
51 409 compromise the confidentiality or consent of the study participants.  
52  
53

54 410  
55  
56  
57  
58  
59  
60

1  
2  
3 411 **Patient consent for publication**  
4

5 412 Not required.  
6  
7

8 413  
9

10 414  
11  
12

13 415  
14

15 416  
16

17 417  
18

19 418  
20

21 419  
22

23 420  
24

25 421  
26

27 422  
28

29 423  
30

31 424  
32

33 425  
34

35 426  
36

37 427  
38

39 428  
40

41 429  
42

43 430  
44

45 431  
46

47 432  
48

49 433  
50

51 434  
52

53 435  
54

55 436  
56

57 437  
58

59 438  
60

439

440

441

442

443

444

445

446

447

448



449 **References**

- 450 1. Organization WH. Sustainable Development Goals 2015 [Available from:  
451 <http://www.un.org/sustainabledevelopment/sustainable-development-goals/>.
- 452 2. Organization TWH. Global Health Observatory (GHO) data: HIV/AIDS 2019 [Available  
453 from: <https://www.who.int/gho/hiv/en/>.
- 454 3. UNAIDS. 90–90–90—An ambitious treatment target to help end the AIDS epidemic  
455 2017 [Available from: <https://www.unaids.org/en/resources/documents/2017/90-90-90>.
- 456 4. HIV/AIDS JUNPo. Stigma and discrimination 2003 [Available from:  
457 [http://data.unaids.org/Publications/fact-sheets03/fs\\_stigma\\_discrimination\\_en.pdf](http://data.unaids.org/Publications/fact-sheets03/fs_stigma_discrimination_en.pdf).
- 458 5. Chambers LA, Rueda S, Baker DN, Wilson MG, Deutsch R, Raeifar E, et al. Stigma,  
459 HIV and health: a qualitative synthesis. *BMC Public Health*. 2015;15:848.
- 460 6. Datta S, Bhattacharjee S, Sherpa PL, Banik S. Perceived HIV Related Stigma among  
461 Patients Attending ART Center of a Tertiary Care Center in Rural West Bengal, India. *J Clin  
462 Diagn Res*. 2016;10(10):VC09-VC12.
- 463 7. Kermode M, Holmes W, Langkham B, Thomas MS, Gifford S. HIV-related knowledge,  
464 attitudes and risk perception amongst nurses, doctors and other healthcare workers in rural India.  
465 *Indian J Med Res*. 2005;122(3):258-64.
- 466 8. Vorasane S, Jimba M, Kikuchi K, Yasuoka J, Nanishi K, Durham J, et al. An  
467 investigation of stigmatizing attitudes towards people living with HIV/AIDS by doctors and  
468 nurses in Vientiane, Lao PDR. *BMC Health Serv Res*. 2017;17(1):125.
- 469 9. Link BG, Phelan JC. Conceptualizing Stigma. *Annual Review of Sociology*.  
470 2001;27(1):363-85.
- 471 10. Steward WT, Bharat S, Ramakrishna J, Heylen E, Ekstrand ML. Stigma is associated  
472 with delays in seeking care among HIV-infected people in India. *J Int Assoc Provid AIDS Care*.  
473 2013;12(2):103-9.
- 474 11. Ekstrand ML, Ramakrishna J, Bharat S, Heylen E. Prevalence and drivers of HIV stigma  
475 among health providers in urban India: implications for interventions. *J Int AIDS Soc*. 2013;16(3  
476 Suppl 2):18717.
- 477 12. Katz IT, Ryu AE, Onuegbu AG, Psaros C, Weiser SD, Bangsberg DR, et al. Impact of  
478 HIV-related stigma on treatment adherence: systematic review and meta-synthesis. *J Int AIDS  
479 Soc*. 2013;16(3 Suppl 2):18640.
- 480 13. data U. 2017 [Available from:  
481 [http://www.unaids.org/sites/default/files/media\\_asset/20170720\\_Data\\_book\\_2017\\_en.pdf](http://www.unaids.org/sites/default/files/media_asset/20170720_Data_book_2017_en.pdf).
- 482 14. Organization NAC. 2016-2017 [Available from:  
483 <http://naco.gov.in/sites/default/files/NACO%20ANNUAL%20REPORT%202016-17.pdf>.
- 484 15. WELFARE MPs AcsDOHF. [Available from: [http://www.mpsacsb.org/MPSACS-  
485 introduction.php](http://www.mpsacsb.org/MPSACS-introduction.php).
- 486 16. Bagcchi S. India passes law prohibiting discrimination against people with HIV/AIDS.  
487 *BMJ*. 2017;357:j1973.
- 488 17. , Office of the Registrar General & Census Commissioner I. Census of India 2011  
489 [Available from: [http://censusindia.gov.in/2011-prov-results/data\\_files/mp/01Content.pdf](http://censusindia.gov.in/2011-prov-results/data_files/mp/01Content.pdf).
- 490 18. Economic and Human Development Indicators 2011 [Available from:  
491 [http://www.undp.org/content/dam/india/docs/madhyapradesh\\_factsheet.pdf](http://www.undp.org/content/dam/india/docs/madhyapradesh_factsheet.pdf).
- 492 19. Nebhinani N, Mattoo SK, Wanchu A. HIV Stigma and Specified Correlates in North  
493 India. *Indian J Psychol Med*. 2012;34(4):324-31.

- 1  
2  
3 494 20. Kumar N, Unnikrishnan B, Thapar R, Mithra P, Kulkarni V, Holla R, et al.  
4 495 Stigmatization and Discrimination toward People Living with HIV/AIDS in a Coastal City of  
5 496 South India. *J Int Assoc Provid AIDS Care*. 2017;16(3):226-32.  
6  
7 497 21. Nyblade L, Stangl A, Weiss E, Ashburn K. Combating HIV stigma in health care  
8 498 settings: what works? *J Int AIDS Soc*. 2009;12:15.  
9 499 22. Wu S, Li L, Wu Z, Liang LJ, Cao H, Yan Z, et al. A brief HIV stigma reduction  
10 500 intervention for service providers in China. *AIDS Patient Care STDS*. 2008;22(6):513-20.  
11 501 23. Shah SM, Heylen E, Srinivasan K, Perumpil S, Ekstrand ML. Reducing HIV stigma  
12 502 among nursing students: a brief intervention. *West J Nurs Res*. 2014;36(10):1323-37.  
13 503 24. Pisal H, Sutar S, Sastry J, Kapadia-Kundu N, Joshi A, Joshi M, et al. Nurses' health  
14 504 education program in India increases HIV knowledge and reduces fear. *J Assoc Nurses AIDS*  
15 505 *Care*. 2007;18(6):32-43.  
16 506 25. Nyamathi A, Vatsa M, Khakha DC, McNeese-Smith D, Leake B, Fahey JL. HIV  
17 507 knowledge improvement among nurses in India: using a train-the-trainer program. *J Assoc*  
18 508 *Nurses AIDS Care*. 2008;19(6):443-9.  
19 509 26. Li L, Lin C, Guan J, Wu Z. Implementing a stigma reduction intervention in healthcare  
20 510 settings. *J Int AIDS Soc*. 2013;16(3 Suppl 2):18710.  
21 511 27. Aggarwal S, Lee DH, Minter WB, Fenning RT, Raja SK, Bernstein ME, et al. Another  
22 512 Generation of Stigma? Assessing Healthcare Student Perceptions of HIV-Positive Patients in  
23 513 Mwanza, Tanzania. *AIDS Patient Care STDS*. 2017;31(2):87-95.  
24 514 28. Sharma M, Joshi R, Shah H, Macaden R, Lundborg CS. A step-wise approach towards  
25 515 introduction of an alcohol based hand rub, and implementation of front line ownership- using a,  
26 516 rural, tertiary care hospital in central India as a model. *BMC Health Serv Res*. 2015;15:182.  
27 517 29. Ganczak M, Barss P, Alfaresi F, Almazrouei S, Muraddad A, Al-Maskari F. Break the  
28 518 silence: HIV/AIDS knowledge, attitudes, and educational needs among Arab university students  
29 519 in United Arab Emirates. *J Adolesc Health*. 2007;40(6):572 e1-8.  
30 520 30. Chaudoir SR, Dugan AG, Barr CH. Measuring factors affecting implementation of health  
31 521 innovations: a systematic review of structural, organizational, provider, patient, and innovation  
32 522 level measures. *Implement Sci*. 2013;8:22.  
33 523 31. USAID. CAN WE MEASURE HIV/AIDS-RELATED STIGMA AND  
34 524 DISCRIMINATION?  
35 525 CURRENT KNOWLEDGE ABOUT QUANTIFYING STIGMA IN DEVELOPING  
36 526 COUNTRIES 2006 [Available from:  
37 527 <http://www.policyproject.com/pubs/generalreport/Measure%20HIV%20Stigma.pdf>.  
38 528 32. Doda A, Negi G, Gaur DS, Harsh M. Human immunodeficiency virus/acquired immune  
39 529 deficiency syndrome: A survey on the knowledge, attitude, and practice among medical  
40 530 professionals at a tertiary health-care institution in Uttarakhand, India. *Asian J Transfus Sci*.  
41 531 2018;12(1):21-6.  
42 532 33. Mazmanian PE, Davis DA. Continuing medical education and the physician as a learner:  
43 533 guide to the evidence. *JAMA*. 2002;288(9):1057-60.  
44 534 34. Davis DA, Thomson MA, Oxman AD, Haynes RB. Changing physician performance. A  
45 535 systematic review of the effect of continuing medical education strategies. *JAMA*.  
46 536 1995;274(9):700-5.  
47 537 35. Li L, Wu Z, Liang LJ, Lin C, Guan J, Jia M, et al. Reducing HIV-related stigma in health  
48 538 care settings: a randomized controlled trial in China. *Am J Public Health*. 2013;103(2):286-92.  
49  
50  
51  
52  
53  
54  
55  
56  
57  
58  
59  
60

1  
2  
3 539 36. Tarja Suominen LL, Dmitry Lioznov, Maya Polukova, Svetlana Nikolaenko, Liudmila  
4 540 Lipiäinen, Maritta Välimäki, Jari Kylmä, Kylmä J. Willingness to take care of HIV positive  
5 541 people: Responses from Russian nursing students. *Nordic Journal of Nursing Research*.  
6 542 2015;35(2):71-6.  
7 543  
8  
9  
10  
11  
12  
13  
14  
15  
16  
17  
18  
19  
20  
21  
22  
23  
24  
25  
26  
27  
28  
29  
30  
31  
32  
33  
34  
35  
36  
37  
38  
39  
40  
41  
42  
43  
44  
45  
46  
47  
48  
49  
50  
51  
52  
53  
54  
55  
56  
57  
58  
59  
60

For peer review only

**Figure 1 Inclusion and exclusion criteria of the study participants**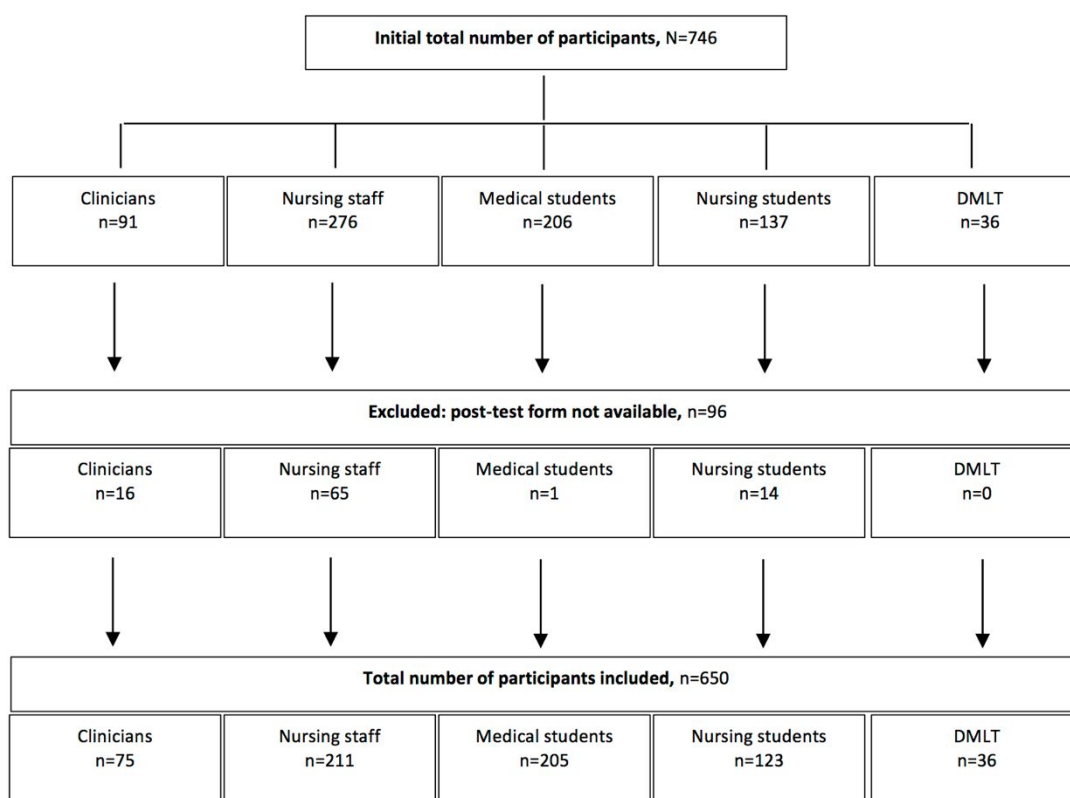

DMLT= Students of Diploma in Medical and Laboratory Technology, Medical students= Students of Bachelor of Medicine, Bachelor of Surgery

# BMJ Open

## Impact of 'HIV-related stigma-reduction workshops' on knowledge and attitude of healthcare providers and students in Central India: A pre- and post-test intervention study

|                                 |                                                                                                                                                                                                                                                                                                                                                                    |
|---------------------------------|--------------------------------------------------------------------------------------------------------------------------------------------------------------------------------------------------------------------------------------------------------------------------------------------------------------------------------------------------------------------|
| Journal:                        | <i>BMJ Open</i>                                                                                                                                                                                                                                                                                                                                                    |
| Manuscript ID                   | bmjopen-2019-033612.R1                                                                                                                                                                                                                                                                                                                                             |
| Article Type:                   | Original research                                                                                                                                                                                                                                                                                                                                                  |
| Date Submitted by the Author:   | 13-Jan-2020                                                                                                                                                                                                                                                                                                                                                        |
| Complete List of Authors:       | Machowska, Anna; Karolinska Institute, Department of Global Public Health<br>Bamboria, Babu Lal; RD Gardi Medical College, Department of Medicine<br>Bercan, Courtney; Karolinska Institutet, Department of Global Public Health<br>Sharma, Megha; Karolinska Institutet, Department of Global Public Health; RD Gardi Medical College, Department of Pharmacology |
| <b>Primary Subject Heading</b>: | Medical education and training                                                                                                                                                                                                                                                                                                                                     |
| Secondary Subject Heading:      | HIV/AIDS, Medical education and training, Health services research, Public health, Occupational and environmental medicine                                                                                                                                                                                                                                         |
| Keywords:                       | People living with HIV/AIDS, Stigma and discrimination, Health Care Professionals, HIV-related stigma-reduction workshop, Health & safety < HEALTH SERVICES ADMINISTRATION & MANAGEMENT, MEDICAL EDUCATION & TRAINING                                                                                                                                              |
|                                 |                                                                                                                                                                                                                                                                                                                                                                    |

SCHOLARONE™  
Manuscripts

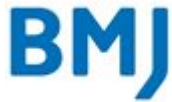

I, the Submitting Author has the right to grant and does grant on behalf of all authors of the Work (as defined in the below author licence), an exclusive licence and/or a non-exclusive licence for contributions from authors who are: i) UK Crown employees; ii) where BMJ has agreed a CC-BY licence shall apply, and/or iii) in accordance with the terms applicable for US Federal Government officers or employees acting as part of their official duties; on a worldwide, perpetual, irrevocable, royalty-free basis to BMJ Publishing Group Ltd ("BMJ") its licensees and where the relevant Journal is co-owned by BMJ to the co-owners of the Journal, to publish the Work in this journal and any other BMJ products and to exploit all rights, as set out in our [licence](#).

The Submitting Author accepts and understands that any supply made under these terms is made by BMJ to the Submitting Author unless you are acting as an employee on behalf of your employer or a postgraduate student of an affiliated institution which is paying any applicable article publishing charge ("APC") for Open Access articles. Where the Submitting Author wishes to make the Work available on an Open Access basis (and intends to pay the relevant APC), the terms of reuse of such Open Access shall be governed by a Creative Commons licence – details of these licences and which [Creative Commons](#) licence will apply to this Work are set out in our licence referred to above.

Other than as permitted in any relevant BMJ Author's Self Archiving Policies, I confirm this Work has not been accepted for publication elsewhere, is not being considered for publication elsewhere and does not duplicate material already published. I confirm all authors consent to publication of this Work and authorise the granting of this licence.

1 **Impact of ‘HIV-related stigma-reduction workshops’ on knowledge and attitude of**  
2 **healthcare providers and students in Central India: A pre- and post-test intervention study**

3 Anna Machowska<sup>1#</sup>, BL Bamboria<sup>2#</sup>, Courtney Bercan<sup>1</sup>, Megha Sharma<sup>1,3§</sup>

4 <sup>1</sup> Department of Global Public Health, Karolinska Institutet, Stockholm, Sweden

5 <sup>2</sup> Department of Medicine, Ruxmaniben Deepchand Gardi Medical College, Ujjain, India

6 <sup>3</sup> Department of Pharmacology, Ruxmaniben Deepchand Gardi Medical College, Ujjain, India

7  
8 §Corresponding author:

9 Dr Megha Sharma

10 Researcher,

11 Department of Global Public Health, Karolinska Institutet, Stockholm, Sweden

12  
13 Associate Professor,

14 Department of Pharmacology, R.D. Gardi Medical College, Surasa, MP, India

15 e-mail: [megha.sharma@ki.se](mailto:megha.sharma@ki.se)

16  
17 # These authors have contributed equally to the work

18  
19 **E-mail addresses of authors:**

20 [Anna.machowska@ki.se](mailto:Anna.machowska@ki.se)

21 [drblbamboria53@gmail.com](mailto:drblbamboria53@gmail.com)

22 [courtney\\_bercan@hotmail.com](mailto:courtney_bercan@hotmail.com)

23 [megha.sharma@ki.se](mailto:megha.sharma@ki.se), [meghasharma27@rediffmail.com](mailto:meghasharma27@rediffmail.com)

## 24 **Abstract**

25 **Introduction:** People living with human immunodeficiency virus (HIV) and acquired  
26 immunodeficiency syndrome (AIDS-PLWHA) experience stigma and discrimination throughout  
27 their life. The consequences of stigma and discrimination are severe when enacted by healthcare  
28 providers (HCPs), and result in a delay in or poor adherence to treatment. Studies have  
29 demonstrated the universal presence of stigmatising behaviours among HCPs, yet only a few have  
30 presented the effect of interventions on the knowledge and attitude of practising (doctors and  
31 nurses) and future HCPs (students).

32 **Objectives:** To evaluate knowledge, attitudes and infection risk perceptions related to HIV/AIDS  
33 among practising and future HCPs in Central India. In addition, the impact of the ‘HIV-related  
34 stigma-reduction workshop’ using a pre-and post-intervention study design was evaluated.

35 **Settings and participants:** The study was conducted in 2016 at two tertiary-care hospitals and  
36 among three healthcare colleges in Central India. Overall, 650 HCPs (75 clinicians and 211 nurses)  
37 and students (205 medical, 123 nursing and 36 Diploma in Medical and Laboratory Technology  
38 [DMLT]) voluntarily participated in the study.

39 **Intervention:** The educational intervention comprised of training in epidemiology, the  
40 transmission and treatment of the HIV infection, the rights of PLWHA, the duties of HCPs and the  
41 use of standard precautions.

42 **Results:** At pre-intervention, DMLT students had the lowest and clinicians the highest knowledge  
43 scores (24% and 45% respectively). The stigmatised attitude was reflected in all groups, the lowest  
44 among clinicians (21%) and the highest among DMLT students (34%). Improvement in the post-



1  
2  
3 45 intervention knowledge scores was the highest in medical students (36%) and the lowest among  
4  
5 46 clinicians (16%). The participants' attitudes improved between 3% and 17% across all groups.  
6  
7

8  
9 47 **Conclusions:** Significant post-intervention improvements were seen in both knowledge and  
10  
11 48 attitudes in all groups. Students had a higher tendency to improve than HCPs. Further long-term  
12  
13 49 studies are needed to evaluate the sustainability of the improvements.  
14  
15

## 16 50 **Article Summary**

### 17 51 **Strengths and limitations of this study**

- 18  
19 52 • A context-specific educational intervention was implemented to improve knowledge and  
20  
21 53 attitudes among HCPs and students towards PLWHA.  
22  
23  
24 54 • The study was conducted at two hospitals and three educational institutes where the  
25  
26 55 participants work and/or study. Thus, we may observe a social desirability bias, resulting  
27  
28 56 in the underestimation of stigma and discrimination among the participants.  
29  
30  
31 57 • The end goal of any educational intervention is to reduce stigmatising behaviours, but  
32  
33 58 behaviour change is a long-term process that is complex to capture and quantify; thus,  
34  
35 59 attitudes were captured as a proxy.  
36  
37  
38 60 • The post-intervention questionnaire was completed immediately after the intervention due  
39  
40 61 to feasibility reasons. Thus, we cannot claim the sustainability of the positive effect of the  
41  
42 62 intervention.  
43  
44  
45 63 • Additional follow-ups would provide stronger evidence of the long-term positive impact  
46  
47 64 of the study on attitudes and knowledge.  
48  
49  
50

## 51 65 **Introduction**

52  
53  
54  
55  
56  
57  
58  
59  
60

1  
2  
3 66 The human immunodeficiency virus (HIV) and acquired immunodeficiency syndrome (AIDS)  
4  
5 67 epidemic is a global challenge. At the end of 2017, it was estimated that 36.9 million people were  
6  
7 68 either infected by HIV or living with AIDS (PLWHA) globally. Of these, about 22 million people  
8  
9 69 could access antiretroviral therapy (ART), and 940,000 people had died from HIV-related illnesses  
10  
11 70 (1, 2). The United Nations' 90-90-90 targets launched in 2014 have become a central pillar of  
12  
13 71 global efforts to end the HIV/AIDS epidemic. The aim is to diagnose 90% of all HIV-positive  
14  
15 72 persons, provide ART for 90% of those diagnosed and achieve viral suppression for 90% of those  
16  
17 73 treated by 2020. The program aims to result in 73% of people with HIV achieving viral  
18  
19 74 suppression, a crucial step in ending the AIDS epidemic, by 2030 (3). Stigma, specifically  
20  
21 75 HIV/AIDS-related stigma, is one of the key aspects of the HIV/AIDS epidemic. This stigma can  
22  
23 76 be described as a socially shared perception of the devalued status of PLWHA (4). The presence  
24  
25 77 of stigma and discrimination against PLWHA at various societal levels fuels the HIV epidemic,  
26  
27 78 and the consequences are more severe if the stigma is present among healthcare providers (HCPs).  
28  
29  
30  
31  
32  
33  
34 79 Healthcare providers are the core and integral part of the healthcare delivery system, and play a  
35  
36 80 pivotal role in creating a positive environment for better health outcomes for PLWHA and  
37  
38 81 preventing viral transmission (5). However, inadequate knowledge about the HIV infection  
39  
40 82 epidemiology among HCPs gives rise to fear and misconceptions about transmission of the  
41  
42 83 infection (6-8). Fear and misconceptions alter attitudes and enhance the development of stigma  
43  
44 84 and discrimination towards PLWHA. Some of the major consequences of this are delays in seeking  
45  
46 85 healthcare, less timely diagnosis, an unwillingness to disclose the HIV status in the community  
47  
48 86 and while seeking healthcare and a delay in or non-compliance to the ART. Not disclosing an HIV  
49  
50 87 status puts society at higher risk of infection transmission, contributes to the increased morbidity  
51  
52 88 and mortality of PLWHA, increases healthcare costs and places a burden on the healthcare sector  
53  
54  
55  
56  
57  
58  
59  
60

1  
2  
3 89 overall (9-11). Therefore, in addition to the diagnosis and treatment, provision of discrimination-  
4  
5 90 and stigma-free healthcare is a prerequisite for achieving the sustainable development target  
6  
7  
8 91 designed to end the epidemic (12).  
9

10  
11 92 In 2016, with a prevalence of 2.1 million PLWHA, India was ranked third in the world after South  
12  
13 93 Africa and Nigeria (13, 14). Although the prevalence of PLWHA varies between states in the  
14  
15 94 country, the threat of the infection spreading is high throughout the country due to high levels of  
16  
17 95 inter-state and inter-district migration (15). Global organisations and governments in countries  
18  
19 96 with a high infection risk, including India, have prioritised stigma-reduction through various  
20  
21 97 intervention programs (16). In India, the National AIDS Control Organisation (NACO) advocates  
22  
23 98 the prohibition of social discrimination against PLWHA (14, 16). The organisation has identified  
24  
25 99 seven districts as having high HIV-prevalence; Ujjain is an administrative unit that includes four  
26  
27 100 of these high-risk districts (Neemuech, Mandsour, Ujjain and Ratlam) (17, 18). However, the data  
28  
29 101 available in various parts of the country shows that PLWHA have experienced stigma and  
30  
31 102 discrimination from the community and HCPs (19, 20).  
32  
33  
34  
35  
36

37 103 Educational interventions intended to improve knowledge of HIV/AIDS are effective in reducing  
38  
39 104 stigma among HCPs and improving healthcare delivery (12, 21-25). Stigma-reduction intervention  
40  
41 105 studies are, in general, time-consuming and resource-intensive, and most of them have mainly  
42  
43 106 focused on nurses and nursing students, and not on clinicians and healthcare students (10, 22-24).  
44  
45 107 However, medical, laboratory technician and nursing students are future HCPs, which means it is  
46  
47 108 important to develop appropriate interventions to improve their knowledge and reduce their HIV-  
48  
49 109 related stigma while targeting both practising (clinicians and nurses) and future (the students)  
50  
51 110 HCPs (26). However, we know little about HIV/AIDS-related knowledge, attitudes and infection  
52  
53  
54 111 risk perceptions of practising and future HCPs in India.  
55  
56  
57  
58  
59  
60

## 112 **Objectives**

113 To evaluate the knowledge, attitudes and infection risk perceptions related to HIV/AIDS among  
114 HCPs and healthcare students in the Ujjain district of Central India. Furthermore, to assess and  
115 compare the impact of the ‘HIV-related stigma-reduction workshop’ intervention on the  
116 participant groups using a pre-and post-intervention study design.

## 117 **Methods**

118 This intervention study was conducted between January 2016 and August 2016 at three colleges  
119 of healthcare courses and two tertiary-care hospitals in Ujjain district in Madhya Pradesh state in  
120 India. An approval was obtained from the ethics committee of R. D. Gardi Medical College,  
121 Surasa, Ujjain, India, prior to the study. One of the hospitals is associated with a medical college,  
122 a nursing college and a DMLT college and is referred to as the teaching hospital (TH). An ART  
123 centre with specialized healthcare facilities for the PLWHAs is located at the TH. Another  
124 participating hospital is referred to as the non-teaching hospital (NTH). In this study, the students  
125 of Bachelor of Medicine, Bachelor of Surgery (MBBS), are referred to as medical students (27).

## 126 **Patient and Public Involvement**

127 There was no direct involvement of patients or the public in the present study.

## 128 **Participants**

129 The participants were practising HCPs, i.e. clinicians and nurses, and future HCPs, i.e. students of  
130 medical, nursing and Diploma in Medical and Laboratory Technology (DMLT) courses, enrolled  
131 in respective institutes in Ujjain district of Central India.

## 132 **Sampling strategy**

133 All groups of the HCPs and students were invited to participate in the workshop through various  
134 means such as leaflets posted at the notice boards, announcements during lectures or meetings.  
135 The leaflets were written in Hindi and English to offer equal chances for all potential participants  
136 to learn about and attend the workshop to enhance their HIV/AIDS-related knowledge and ways  
137 to stay protected at the workplace. The workshops were conducted at respective colleges and  
138 hospitals to provide an equal opportunity to participate.

## 139 **Inclusion and exclusion criteria**

140 Participation was voluntary, and the participant could leave the session at any time without  
141 experiencing any repercussions. The participants who could not attend or complete both the pre-  
142 and post-workshop sessions were excluded from the analysis (Figure 1).

## 143 **Figure 1 Inclusion and exclusion criteria of the study participants Intervention**

### 144 *Structure of the workshops*

145 The intervention was designed as an educational workshop that suited best the local context. All  
146 workshops were conducted by the same facilitators: a clinician and an officer-in-charge of the  
147 ART centre at the TH (BLB), and the team leader of hospital infection prevention and control team  
148 at the TH and the NTH (MS). In total, 13 workshops were conducted. Participants were divided  
149 into smaller groups as follows: clinicians (two groups), nurses (five groups), medical students  
150 (three groups), nursing students (two groups) and DMLT students (one group) to ensure that they  
151 feel comfortable in the learning environment.

### 152 *Content of the workshops*

153 The workshop was two hours long and divided into three sessions: the first session consisted of an  
154 animated video demonstrating the HIV infection epidemiology, the mechanism of viral  
155 transmission, diagnostic testing, treatment options, how the ART drugs work and ethical issues  
156 related to PLWHA and ART. This was followed by a second session that involved a PowerPoint  
157 presentation focusing on topics such as the rights of PLWHA, the duties of HCPs and predictable  
158 consequences due to stigma and discrimination against PLWHA. The third session was more  
159 interactive and dynamic. Here, information about universal precautions and infection prevention  
160 measures and control was provided, describing the importance of the use of standard precautions,  
161 including hand hygiene in the daily routine. It was explained how and when to use gowns, gloves,  
162 face shields, masks and goggles, and the availability of post-exposure prophylaxis (PEP) in the  
163 study settings and the use of an in-house prepared alcohol-based hand rub (i.e. 'Micro *Kavach*')  
164 was discussed (28). This was followed by the demonstration and practice of the WHO-  
165 recommended hand hygiene techniques using 'Micro *Kavach*' (28). A period of 15 to 20 minutes  
166 was assigned for an open discussion. The participants were asked to complete the questionnaire  
167 twice: once before the workshop (pre-intervention) and then after the break (post-intervention).

### 168 **Data collection tool and analysis**

169 The context-specific questionnaires were developed locally and were used as pre- and post-  
170 intervention data collection tools. The questionnaires were pre-tested in each potential participant  
171 groups (not included in this study). After receiving feedback, the questionnaires were modified  
172 and finalised, and brief educational intervention was designed considering the time constraints  
173 among the participants (29). The questionnaires were formatted in both English and Hindi to

1  
2  
3 174 facilitate the understanding of the questions by all participant groups. The questionnaires were  
4  
5 175 divided into the five following sections: (1) participants' demographic information, (2) work  
6  
7 176 experiences, (3) HIV/AIDS-related knowledge, (4) attitudes towards PLWHA, (5) risk perception  
8  
9 177 and willingness to provide care to the PLWHA and patients with Hepatitis B.  
10  
11  
12

13 178 The responses related to the knowledge and attitude questions were scored in the following  
14  
15 179 manner: each correct response in the knowledge section received a score of one, and each incorrect  
16  
17 180 response received a score of zero. Scores of each individual were converted to the percentage of  
18  
19 181 correct responses. Like in previous publications in this field; the levels of knowledge were  
20  
21 182 categorised into "low" for the participants who scored  $\leq 50\%$ , "moderate" for those who scored  
22  
23 183 between 51% and 74%, and "high" for those who scored  $\geq 75\%$  (30).  
24  
25  
26  
27

28 184 Responses to the questions related to participants' attitude towards PLWHAs were classified into  
29  
30 185 three categories: positive (non-stigmatising), unsure, and negative (stigmatising) (31). A positive  
31  
32 186 response was given a score of one and the responses where the participants were unsure or, where  
33  
34 187 the responses indicated a negative attitude including fear, stigma, or intent to discriminate the  
35  
36 188 PLWHA, were given a score of zero (32).  
37  
38  
39

40 189 Scores of each individual were added and converted to the percentage of correct responses.  
41  
42 190 Responses, where the missing data was higher than 50%, were excluded from the analysis. Risk  
43  
44 191 perception questions were categorical and dichotomised according to the outcome of interest for  
45  
46 192 example (a) I am willing or not willing to care for a patient, or (b) I am at high risk or not at high  
47  
48 193 risk of HIV exposure at the workplace.  
49  
50  
51  
52

### 53 194 **Statistical analysis**

54  
55  
56  
57  
58  
59  
60

1  
2  
3 195 The data on demographic and basic HIV-related information was presented as mean and standard  
4  
5 196 deviations for continuous variables and as percentages and frequencies for categorical variables.  
6  
7  
8 197 The knowledge, attitudes and work environment variables were presented as median with  
9  
10 198 interquartile range (IQR). The difference between the pre- and post-intervention scores were  
11  
12 199 analysed using a Wilcoxon signed-rank test for continuous variables and McNemar's test for  
13  
14 200 categorical variables. The score difference was calculated by subtracting the pre-intervention  
15  
16 201 (baseline) score from the post-intervention score and represents the percentage unit increase or  
17  
18 202 decrease concerning the baseline score. As these scores were not normally distributed, a Kruskal-  
19  
20 203 Wallis test was conducted to determine a statistically significant difference among the participant  
21  
22 204 groups in pre-intervention and post-intervention scores as well as the difference of scores. Post-  
23  
24 205 hoc Dunn's tests were conducted to evaluate the relationship between the groups. The statistical  
25  
26 206 significance was set at the level of  $p < 0.05$ . The data was entered in Epi info software (version 3.1)  
27  
28 207 and Microsoft Excel and statistical analysis was performed using the Statistical Package for the  
29  
30 208 Social Sciences (SPSS) and STATA 15.0 (Stata Corp. College Station, Texas, USA) software.

## 36 209 **Results**

### 40 210 **Baseline characteristics**

41  
42 211 In total, 920 people were invited to take part, and 746 (81%) voluntarily participated in the study.  
43  
44 212 Of these, 650 (87%) attended all three sessions of the workshop and completed the questionnaire  
45  
46 213 twice; 56% were students and 44% were practising HCPs. Thus, data from these 650 participants  
47  
48 214 was included in the analysis (Figure 1).

51  
52 215 The mean age of the participants was 23 years, the majority were of the Hindu faith and 56% were  
53  
54 216 males (Table 1). The proportion of participants who had received HIV/AIDS-related training



217 previously varied from 4% in the clinicians' group to 78% in the DMLT students' group. Only 2%  
 218 of medical students stated that they had worked with PLWHA before. A high proportion of  
 219 participants in each group reported experiencing accidental exposure to HIV or PLWHA. A range  
 220 of 9% to 20% of the participants admitted discriminating against PLWHA in workplaces. Six (3%)  
 221 of the medical students and up to 11% of DMLT students admitted that they had refused to provide  
 222 care for PLWHA during their scheduled clinical visits, while between 17% and 28% of participants  
 223 thought that their colleagues discriminated against PLWHA (Table 1).

224 **Table 1 Baseline demographic information (Part A) and experiences (Part B) of the**  
 225 **participants.**

|                                                                                         | Clinicians<br>(n=75) | Nurses<br>(n=211) | Medical students<br>(n=205) | Nursing students<br>(n=123) | DMLT students<br>(n=36) |
|-----------------------------------------------------------------------------------------|----------------------|-------------------|-----------------------------|-----------------------------|-------------------------|
| <b>Part A: Baseline demographic information</b>                                         |                      |                   |                             |                             |                         |
| Age, mean (SD)                                                                          | 28 (4)               | 25 (6)            | 20 (1)                      | 21 (3)                      | 20 (2)                  |
| Sex, n (%)                                                                              |                      |                   |                             |                             |                         |
| Male                                                                                    | 30 (40)              | 148 (70)          | 109 (53)                    | 51 (41)                     | 28 (78)                 |
| Female                                                                                  | 45 (60)              | 63 (30)           | 96 (47)                     | 72 (59)                     | 8 (22)                  |
| Married, n (%)                                                                          | 21 (28)              | 70 (33)           | -                           | 11 (9)                      | 35 (97)                 |
| Religion, n (%)                                                                         |                      |                   |                             |                             |                         |
| Hindu                                                                                   | 62 (83)              | 192 (91)          | 183 (89)                    | 120 (98)                    | 31                      |
| Muslim                                                                                  | 2 (3)                | 5 (2)             | 6 (3)                       | 3 (2.4)                     | 4                       |
| Christian                                                                               | 2 (3)                | 10 (5)            | 1 (0.5)                     | -                           | -                       |
| Other                                                                                   | 9 (12)               | 4 (2)             | 15 (7)                      | -                           | 2                       |
| Have you ever attended any HIV/AIDS related training? Yes, n (%)                        | 3 (4)                | 39 (18)           | 63 (31)                     | 28 (23)                     | 28 (78)                 |
| <b>Part B: Experiences of participants</b>                                              |                      |                   |                             |                             |                         |
| Have you ever cared for PLWHA before? Yes, n (%)                                        | 37 (49)              | 121 (57)          | 4 (2)                       | 88 (72)                     | 18 (50)                 |
| If Yes, how many times have you cared for PLWHA?                                        |                      |                   |                             |                             |                         |
| Less than 10 times                                                                      | 29 (78)              | 59 (49)           | 2 (50)                      | 61 (69)                     | 5 (28)                  |
| Less than 50 times                                                                      | 2 (5)                | 27 (22)           | -                           | 14 (20)                     | 8 (44)                  |
| More than 100 times                                                                     | 1 (3)                | 19 (16)           | -                           | -                           | 5 (28)                  |
| Cannot recall the numbers /too many                                                     | -                    | 16 (13)           | 2 (50)                      | 13 (15)                     | -                       |
| §Have you ever had an accidental exposure with body fluid of PLWHA, at work? Yes, n (%) | §4 (11)              | §24 (20)          | §3 (75)                     | §14 (16)                    | §1 (6)                  |
| Have you ever refused to care for PLWHA? Yes, n (%)                                     | 6 (8)                | 18 (9)            | 6 (3)                       | 6 (5)                       | 4 (11)                  |
| Have you discriminated against PLWHA at the workplace? Yes, n (%)                       | 7 (9)                | 42 (20)           | 22 (11)                     | 13 (11)                     | 5 (19)                  |
| Do you think your colleagues discriminate against PLWHA? Yes, n (%)                     | 21 (28)              | 45 (21)           | 51 (25)                     | 28 (23)                     | 6 (17)                  |
| Is your family aware that you ought to care for PLWHA patients as well? Yes, n (%)      | 49 (65)              | 134 (64)          | 127 (62)                    | 100 (81)                    | 16 (72)                 |

|                                                                                      |         |          |         |         |         |
|--------------------------------------------------------------------------------------|---------|----------|---------|---------|---------|
| Is there any family pressure regarding caring for PLWHAs? Yes, n (%)                 | 15 (20) | 46 (22)  | 16 (8)  | 15 (12) | 8 (22)  |
| Do you have any friend or family who is identified as PLWHA? Yes, n (%)              | 3 (4)   | 16 (8)   | 3 (2)   | 5 (4)   | 2 (6)   |
| There is enough equipment to maintain universal precautions at workplace. Yes, n (%) | 20 (27) | 126 (60) | 79 (39) | 84 (68) | 19 (53) |
| Have you ever had any accidental exposure to HIV through PLWHA at work? Yes, n (%)   | 4 (5)   | 24 (11)  | 3 (1)   | 14 (11) | 1 (3)   |

226 Yes, n (%): Proportion of the participants who responded “Yes” to the questions asked  
 227 DMLT= Students of Diploma in Medical and Laboratory Technology; Medical students= Students of Bachelor of  
 228 Medicine, Bachelor of Surgery; PLWHA= people living with HIV/AIDS  
 229 The boxes where totals do not add up to 100%, the remaining percentage of the participants did not respond to that  
 230 question. §Proportion calculated from patients who confirmed that they have ever cared for PLWHA.

231  
 232  
 233

### Impact of the intervention on knowledge scores

234 The pre-intervention knowledge score, presented as the percentage of correct responses,  
 235 demonstrated the low overall level of knowledge, with the poorest in DMLT students (22%) and  
 236 the highest among the clinicians (45%, Table 2). The post-intervention knowledge scores ranged  
 237 from 48% in the nurses’ group to 64% in the medical students’ group. The post-intervention  
 238 knowledge scores were significantly higher than the pre-intervention knowledge scores ( $p < 0.001$ ,  
 239 Table 2), almost all groups reached a moderate level of knowledge. The difference between the  
 240 knowledge scores of all study groups was statistically significant ( $p < 0.001$ ). The knowledge scores  
 241 of both medical and nursing students improved more than their respective practising HCPs. A  
 242 pairwise comparison showed that at the pre-intervention stage, the clinicians had the highest  
 243 knowledge level of all the groups ( $p < 0.001$ , Table 3). However, at the post-intervention stage, the  
 244 medical students presented higher knowledge levels than the clinicians, while the knowledge of  
 245 the nurses was the lowest.

### 246 Impact of the intervention on attitude

247 Evidence of a stigmatised attitude was observed among all responder groups. The lowest level of  
 248 stigmatising attitudes at pre-intervention was found in the clinicians' group, where 79% responded  
 249 to the questions without stigma. On the other hand, in the DMLT students' group, only 66% of  
 250 responses presented a non-stigmatising attitude (Table 2). At post-intervention, the percentages of  
 251 non-stigmatising responses were higher, ranging from 79% (lowest) among the nurses to 84% in  
 252 the medical students' group. The attitude improved significantly across all groups, with a 3%  
 253 increase in the clinician group and 17% in the DMLT students' group ( $p < 0.001$ ). Overall, the  
 254 intervention resulted in an improvement in stigma levels of up to 21%, as shown in the nurses'  
 255 group. A pairwise comparison showed that medical students had the greatest improvement in their  
 256 attitude (Table 4).

257 **Table 2. Pre- and post-intervention scores of knowledge and attitude among the participant**  
 258 **groups**

| <b>Knowledge</b>                              |                                          |                                       |                                                 |                                                 |                                             |
|-----------------------------------------------|------------------------------------------|---------------------------------------|-------------------------------------------------|-------------------------------------------------|---------------------------------------------|
|                                               | <b>Clinicians<br/>(n=75)<br/>% (IQR)</b> | <b>Nurses<br/>(n=211)<br/>% (IQR)</b> | <b>Medical students<br/>(n=205)<br/>% (IQR)</b> | <b>Nursing students<br/>(n=123)<br/>% (IQR)</b> | <b>DMLT<br/>students (n=36)<br/>% (IQR)</b> |
| <b>Percentage of correct responses</b>        |                                          |                                       |                                                 |                                                 |                                             |
| <b>Pre-Intervention, median (IQR)</b>         | 45 (15)                                  | 30 (19)                               | 29 (14)                                         | 30 (19)                                         | 22 (14)                                     |
| <b>Post-Intervention, median (IQR)</b>        | 59 (14)                                  | 48 (26)                               | 64 (21)                                         | 59 (26)                                         | 52 (17)                                     |
| <b>Difference</b>                             | 14*                                      | 18*                                   | 35*                                             | 29*                                             | 30*                                         |
| <b>Attitude</b>                               |                                          |                                       |                                                 |                                                 |                                             |
| <b>Percentage of responses without stigma</b> |                                          |                                       |                                                 |                                                 |                                             |
| <b>Pre-Intervention, median (IQR)</b>         | 79 (18)                                  | 74 (15)                               | 74 (18)                                         | 76 (12)                                         | 66 (35)                                     |
| <b>Post-Intervention, median (IQR)</b>        | 82 (11)                                  | 79 (12)                               | 84 (16)                                         | 82 (9)                                          | 83 (14)                                     |
| <b>Difference</b>                             | 3*                                       | 5*                                    | 10*                                             | 5*                                              | 17*                                         |

259 \*Statistically significant differences with significance level  $p < 0.05$ .

260 DMLT= Students of Diploma in Medical and Laboratory Technology; IQR= Interquartile range; Medical students=  
 261 Students of Bachelor of Medicine, Bachelor of Surgery

262

263

264 **Table 3. Pre- and post-intervention pairwise comparison of knowledge between the**  
 265 **participant groups**

| Groups Compared                     | Pre-Intervention knowledge- Adjusted significance | Post-Intervention knowledge- Adjusted significance | Pre- and Post-Intervention knowledge- Adjusted significance |
|-------------------------------------|---------------------------------------------------|----------------------------------------------------|-------------------------------------------------------------|
| DMLT students- Nursing students     | <0.05*                                            | 0.068                                              | 1.000                                                       |
| DMLT students - Medical students    | <0.01*                                            | <0.001*                                            | 0.629                                                       |
| DMLT students -Clinicians           | <0.001*                                           | 0.116                                              | <0.001*                                                     |
| DMLT students - Nurses              | 0.059                                             | 1.000                                              | 0.234                                                       |
| Medical students - Clinicians       | <0.001*                                           | 0.051                                              | <0.001*                                                     |
| Nursing students - Clinicians       | <0.001*                                           | 1.000                                              | <0.001*                                                     |
| Nursing students – Medical students | 1.000                                             | <0.05*                                             | 0.934                                                       |
| Nurses- Nursing students            | 1.000                                             | <0.001*                                            | <0.001*                                                     |
| Nurses- Clinicians                  | <0.001*                                           | <0.001*                                            | <0.05*                                                      |
| Nurses– Medical students            | 1.000                                             | <0.001*                                            | <0.001*                                                     |

\*Statistically significant differences with significance level  $p < 0.05$ .

Significance values have been adjusted by the Bonferroni correction for multiple tests. DMLT= Students of Diploma in Medical and Laboratory Technology; Medical students= Students of Bachelor of Medicine, Bachelor of Surgery

270 **Table 4. Pre- and post-intervention pairwise comparison of attitudes between the participant**  
 271 **groups**

| Groups Compared                     | Pre-Intervention attitude- Adjusted significance | Post-Intervention attitude- Adjusted significance | Pre- and Post-Intervention attitude- Adjusted significance |
|-------------------------------------|--------------------------------------------------|---------------------------------------------------|------------------------------------------------------------|
| DMLT students - Nursing students    | 0.184                                            | 1.000                                             | 0.147                                                      |
| DMLT students - Medical students    | 0.479                                            | 0.614                                             | 1.000                                                      |
| DMLT students -Clinicians           | <0.01*                                           | 1.000                                             | 0.134                                                      |
| DMLT students - Nurses              | 0.627                                            | 1.000                                             | 0.439                                                      |
| Medical students - Clinicians       | <0.05*                                           | 1.000                                             | <0.01*                                                     |
| Nursing students - Clinicians       | 0.252                                            | 1.000                                             | 1.000                                                      |
| Nursing students – Medical students | 1.000                                            | 0.173                                             | <0.01*                                                     |
| Nurses- Nursing students            | 1.000                                            | 0.614                                             | 1.000                                                      |
| Nurses- Clinicians                  | <0.05*                                           | 0.092                                             | 1.000                                                      |
| Nurses– Medical students            | 1.000                                            | <0.001*                                           | <0.05*                                                     |

\*Statistically significant differences with significance level  $p < 0.05$ . Significance values have been adjusted by the Bonferroni correction for multiple tests.

DMLT= Students of Diploma in Medical and Laboratory Technology; Medical students= Students of Bachelor of Medicine, Bachelor of Surgery

280 **Table 5. Risk perception reported by the participants in the pre- and post-intervention**  
 281 **questionnaires.**

| Questions                                                                    | Time points       | Nurses<br>(n=211)<br>n (%) | Clinicians<br>(n=75)<br>n (%) | Nursing<br>students<br>(n=123)<br>n (%) | Medical<br>students<br>(n=205)<br>n (%) | DMLT<br>students<br>(n=36)<br>n (%) |
|------------------------------------------------------------------------------|-------------------|----------------------------|-------------------------------|-----------------------------------------|-----------------------------------------|-------------------------------------|
| Do you think you are at high risk for HIV/AIDS at work?<br>Yes, n (%)        | Pre-intervention  | 71 (34)                    | 50 (67)                       | 39 (32)                                 | 61 (30)                                 | 22 (61)                             |
|                                                                              | Post-intervention | 81 (38)                    | 51 (68)                       | 86 (70)*                                | 82 (40)*                                | 17(47)                              |
| Are you willing to care for-<br>a) Patients with hepatitis B<br>(Yes), n (%) | Pre-intervention  | 174 (83)                   | 64 (85)                       | 112 (91)                                | 155 (76)                                | 28 (78)                             |
|                                                                              | Post-intervention | 192<br>(91)*               | 65(87)                        | 118 (96)                                | 196 (96)*                               | 32 (89)                             |
| b) PLWHA§ (Yes), n (%)                                                       | Pre-intervention  | 151 (72)                   | 65 (87)                       | 114 (93)                                | 179 (87)                                | 34 (94)                             |
|                                                                              | Post-intervention | 175<br>(83)*               | 66 (88)                       | 110 (89)                                | 183 (89)                                | 30 (83)                             |

282 Yes, n (%): Proportion of the participants who responded “Yes” to the questions asked

283 \*Statistically significant differences with significance level  $p < 0.05$ . DMLT= Students of Diploma in Medical and  
 284 Laboratory Technology; Medical students= Students of Bachelor of Medicine, Bachelor of Surgery; PLWHA= People  
 285 living with HIV/AIDS. §The question was also classified as an attitude question.

### 286 **Impact of the intervention on infection risk perception**

287 Thirty per cent of the medical students and 67% of the clinicians perceived themselves to be at  
 288 high risk of HIV infection in their workplace at the pre-intervention stage. The willingness to care  
 289 for PLWHA was relatively high at the pre-intervention stage, ranging from 72% among the nurses  
 290 to 94% among the DMLT student group. The proportion of the participants who were willing to  
 291 care for people living with Hepatitis B was similar to those willing to care for PLWHA.

292 After the workshop, the medical and nursing students reported a significant increase in their  
 293 awareness of the risk of HIV infection compared to their statements at pre-intervention. There was  
 294 a significant increase in the post-intervention willingness to care for PLWHA in the nursing group,  
 295 and a non-significant decrease in the DMLT and nursing students’ group (Table 5).

296

## 297 **Discussion**

298 The present study evaluated the effect of ‘HIV-related stigma-reduction workshops’ and showed  
299 that there was a significant improvement in HIV/AIDS-related knowledge in all groups who  
300 participated in the intervention, irrespective of their inadequate baseline knowledge. Our study  
301 highlighted the fact that stigmatising attitudes were widespread among practising HCPs and  
302 students of various healthcare courses. However, stigmatising attitudes and discrimination that led  
303 to an unwillingness to provide medical care to PLWHA were significantly reduced among the  
304 participants after the intervention. The student groups showed more receptiveness to improve their  
305 knowledge and attitudes towards PLWHA than the practising HCPs.

### 306 *Knowledge*

307 Low knowledge levels can perpetuate myths and misunderstandings that extend to baseline beliefs  
308 and stigmatising attitudes. The present study showed that while the baseline HIV knowledge of  
309 both the practicing HCPs and the healthcare students was inadequate, there was a significant  
310 knowledge improvement in all participant groups after the intervention. These findings are  
311 comparable with results from a cross-sectional survey conducted among practicing HCPs and  
312 healthcare students in Uttarakhand, India (32). That study also found low levels of HIV-related  
313 knowledge among HCPs and highlighted the need for improved HIV-specific education. Our study  
314 echoed their finding that clinicians had more knowledge than the other groups. This is  
315 understandable, as physicians are likely to receive more HIV-specific training than other types of  
316 HCPs (33).

317 In our study, the overall post-intervention knowledge scores significantly increased in all groups,  
318 and particularly so in the students’ groups. This was similar to the effect of educational

1  
2  
3 319 interventions on HIV knowledge in two single-centre studies involving nursing students in  
4  
5 320 Bengaluru and nurses in Delhi, India (22, 24). In Bengaluru, the intervention was divided into two  
6  
7 321 one-hour sessions, while in Delhi it involved a two-day training program.  
8  
9

10  
11 322 We hypothesised that there would be a greater post-intervention increase in knowledge among the  
12  
13 323 clinicians' group than the other groups. However, the students' groups showed significant  
14  
15 324 knowledge gains and the clinicians showed the lowest increase. The theories suggest that  
16  
17 325 knowledge is associated with baseline beliefs and attitudes, and depends on the readiness of the  
18  
19 326 learners and their willingness to integrate the change into their behaviour (34, 35). As per the  
20  
21 327 educational theory, the recognition of the gap in knowledge and skills, or the need for behaviour  
22  
23 328 change, is essential for making the desired change (34, 35). The student groups, being in the  
24  
25 329 learning phase of life, may have identified their gaps in knowledge, thus making them more  
26  
27 330 receptive to the training than the other groups (34, 35), while the clinicians had adequate  
28  
29 331 knowledge at pre-intervention and thus had less scope to improve their knowledge at the post-  
30  
31 332 intervention stage.  
32  
33  
34  
35

### 36 37 333 *Attitude* 38

39  
40 334 Stigmatising attitudes towards PLWHA can feed into a lack of desire or willingness to learn more  
41  
42 335 about the disease. The present study confirmed our hypothesis that stigmatising attitudes are  
43  
44 336 widespread among practicing HCPs and healthcare students in the region. Our pre-intervention  
45  
46 337 stigma levels were higher in healthcare students and lower in practicing HCPs, which is consistent  
47  
48 338 with a cross-sectional study of HCPs in Uttarakhand, India (33). Professional experience with  
49  
50 339 PLWHA is a predictor of more positive attitudes towards them (14, 27). The higher levels of  
51  
52  
53  
54  
55  
56  
57  
58  
59  
60

1  
2  
3 340 stigmatising attitudes found among participants (students) in our study could be due to incomplete  
4  
5 341 or inadequate knowledge, and relatively less experience of working with PLWHA.  
6  
7

8  
9 342 Studies show that working on empathy-building techniques and including PLWHA testimonies in  
10  
11 343 interventions can improve outcomes for HCPs and contribute to decreasing the stigma and  
12  
13 344 discrimination towards PLWHA (36, 37). Recent studies demonstrate that small efforts such as  
14  
15 345 support in the workplace, HCP-friendly policies and displaying stigma-reduction messages can  
16  
17 346 change HCPs' attitudes towards PLWHA.  
18  
19

20  
21 347 Similar to the knowledge scores, the student groups showed larger improvements in their  
22  
23 348 stigmatising attitudes than the working professionals. We must acknowledge, however, that  
24  
25 349 although improvements in knowledge were seen in all groups, increased knowledge is not typically  
26  
27 350 enough to affect changes in a person's attitudes and the baseline beliefs that contribute to stigma  
28  
29 351 and discrimination. These changes are the result of a complex interplay between knowledge,  
30  
31 352 baseline beliefs and attitudes that affects the readiness of the learners and their willingness to  
32  
33 353 integrate the change into their behaviour (10, 34, 35).  
34  
35  
36  
37

### 38 354 *Risk perception*

39  
40

41  
42 355 Another highlight of our study was the willingness to care for PLWHA shown by the majority of  
43  
44 356 HCPs and students at the pre-intervention stage. Our findings are in line with a study conducted in  
45  
46 357 India by Kermode et al. that showed a relatively high willingness of HCPs to care for PLWHA  
47  
48 358 despite the presence of stigmatising attitudes (7). However, there are few studies that assess risk  
49  
50 359 perception prior to and after a stigma-reduction intervention.  
51  
52  
53  
54  
55  
56  
57  
58  
59  
60



1  
2  
3 360 Medical and nursing students significantly improved their perception of HIV/AIDS risk in the  
4  
5 361 post-intervention test. The same receptiveness to learning that was shown by the student groups in  
6  
7 362 our study is likely to be the reason their knowledge in this area also improved. It must be said,  
8  
9 363 however, that educational interventions may have a limited effect on risk perception if appropriate  
10  
11 364 personal protective materials are not available in the workplace. This points to the necessity to  
12  
13 365 create structural and policy changes that contribute to a safer work environment in conjunction  
14  
15 366 with educational interventions in order to both reduce perceived and actual workplace risk (6, 7).  
16  
17 367 Further studies are needed to determine the factors affecting HCPs' willingness to care for  
18  
19 368 PLWHA.

20  
21  
22  
23  
24  
25 369 Our study is based on the call for new research that promotes the development of knowledge-  
26  
27 370 building and stigma-reduction interventions to target the broad range of HCPs that PLWHA will  
28  
29 371 encounter in their healthcare journeys (38, 39). The scaling-up of HIV stigma-reduction efforts  
30  
31 372 lacks focus throughout the world, and especially in countries with a high HIV prevalence like  
32  
33 373 India. The major challenge is the implementation feasibility of the interventions, mainly due to the  
34  
35 374 time commitment and resources required.

36  
37  
38  
39 375 The number and duration of educational sessions does not necessarily correspond to greater  
40  
41 376 increases in knowledge, and shorter interventions may suffice to bring participants to an adequate  
42  
43 377 level of knowledge (38, 39). Researchers have used various time lengths to assess their  
44  
45 378 intervention designs, and thus it is not appropriate to conclude there is a relationship between the  
46  
47 379 length and number of workshops and the level of change (22, 24, 36, 40). However, it seems that  
48  
49 380 even a short workshop can produce positive results, as seen by the progress of the students' groups  
50  
51 381 in our study.

## 382 **Strengths and limitations**

383 To the best of our knowledge, this is the first study that presents knowledge and stigma in terms  
384 of attitudes towards PLWHA among various groups of practising and future HCPs. Context-  
385 specific low-cost educational intervention was feasible and appreciated by most of the HCPs  
386 during both the pilot testing and the real study. Our intervention is brief and requires relatively few  
387 resources and little time, which is important in settings where HCPs work. These features increase  
388 the generalisability and feasibility of adopting the intervention design and applying it in other  
389 similar settings where HCPs are burdened by a heavy workload.

390 This study shows that an educational and skills-based intervention, even if only for two hours, can  
391 be effective in increasing knowledge and reducing stigmatised attitudes. Therefore, recurrent  
392 training and educational workshops might have a sustainable effect of improved knowledge and  
393 reduced stigmatised attitudes and behaviour towards PLWHA. Finally, the present study fills a  
394 knowledge gap by providing a better understanding of the knowledge, attitudes and risk  
395 perceptions of various HCPs and healthcare students in India and globally.

396 Like any study, this methodology must be seen in the context of its limitations. The major  
397 consideration of our study is that the post-intervention questionnaire was completed after a short  
398 break following the intervention. Thus, we could not validate whether the reduction in stigmatising  
399 beliefs was sustained over time. The end goal of the intervention was to reduce stigmatised  
400 behaviour. However, behaviour change is a long-term process and is complex to capture and  
401 quantify; thus, we were restricted to capturing attitudes as a proxy. Although the present one-time  
402 post-intervention data collection design presents a strong association between the intervention and  
403 the results, additional follow-ups, for example at four weeks, six months and one year, would

1  
2  
3 404 provide stronger evidence for the positive impact of the study on attitudes and knowledge than the  
4  
5 405 current design.  
6  
7

8  
9 406 Given that the study was conducted in workplaces, the presence of social desirability bias in  
10  
11 407 participants' stigma-related responses cannot be ruled out. Therefore, it is possible that the rate of  
12  
13 408 stigma presented in the study is underestimated. The voluntary participation, with an emphasis on  
14  
15 409 increasing knowledge, and the anonymous questionnaire completion, might have motivated HCPs  
16  
17 410 to participate in the study.  
18  
19

## 20 21 411 **Conclusions**

22  
23  
24 412 Combating stigma is a key priority in achieving success in epidemic control and providing quality  
25  
26 413 care to PLWHA. The findings from this study show that the HIV-related stigma-reduction  
27  
28 414 workshops that are brief, feasible and relatively low-resource interventions, can successfully  
29  
30 415 increase knowledge and reduce stigma in both HCPs and students. Considering the generalisability  
31  
32 416 and feasibility of the intervention design, repetitive contextualised workshops with extended  
33  
34 417 follow-ups are recommended to evaluate their impact and assure sustainable effect. We propose  
35  
36 418 incorporating of more practical and integrated educational training in the teaching curricula of all  
37  
38 419 healthcare courses. This will benefit the HCPs, PLWHAs and the community. Moreover, in future  
39  
40 420 studies, we recommend the inclusion of a qualitative component and behavioural assessment to  
41  
42 421 understand participants' attitudes and willingness to change stigmatising behaviour towards  
43  
44 422 PLWHA.  
45  
46  
47  
48  
49

## 50 51 423 **Acknowledgements**

52  
53  
54  
55  
56  
57  
58  
59  
60

1  
2  
3 424 We thank all study participants, the management and staff of the hospitals and colleges for  
4  
5 425 facilitating and supporting the study. We are thankful to Mr Amit Pawar for assisting in data  
6  
7 426 collection and data management.  
8  
9

## 10 11 427 **Footnotes**

### 12 13 14 428 **Author contributions**

15  
16  
17  
18 429 MS and BLB perceived the study. MS and BLB designed the questionnaire and the content of the  
19  
20 430 interventions. MS and BLB conducted the training sessions and collected the pre-and post-  
21  
22 431 intervention data. AM, CB and MS performed the analysis. AM and MS drafted the article. AM,  
23  
24 432 MS, BLB and CB gave critical comments to modify the manuscript. All authors gave final  
25  
26 433 approval to the present version for publication.  
27  
28  
29

### 30 434 **Funding**

31  
32  
33 435 This work was supported by Swedish Research Council grant number 2017-01327.  
34  
35  
36

### 37 436 **Competing interests**

38  
39  
40 437 Authors have no conflicts of interests to declare.  
41  
42

### 43 438 **Ethical considerations**

44  
45  
46  
47 439 Ethical approval was granted by the ethics committee of R. D. Gardi Medical College, Surasa,  
48  
49 440 Ujjain, India with letter numbers 311/17-07-2013 and 249/23-01-2013. Verbal and written  
50  
51 441 consents were obtained from each participant before the study. Participants were assured by the  
52  
53  
54  
55  
56  
57  
58  
59  
60

1  
2  
3 442 researchers for full confidentiality. Participants were encouraged to respond to the questionnaires  
4  
5 443 fearlessly and were ensured for no repercussions based on the responses.  
6  
7

8  
9 444 **A data sharing statement**

10  
11 445 All data generated during the study are included in the article. The data are not publicly available  
12  
13 446 at present because it contains information that could compromise the confidentiality or consent of  
14  
15 447 the study participants.  
16  
17

18  
19 448 **Patient consent for publication**

20  
21 449 Not required.  
22  
23

24 450

25  
26 451

27  
28 452

29  
30 453

31  
32 454

33  
34 455

35  
36 456

37  
38 457

39  
40 458

41  
42 459

43  
44 460

45  
46 461

47  
48 462

49  
50 463

51  
52 464

465 **References**

- 466 1. The WHO. Sustainable Development Goals 2015 [Available from:  
467 <http://www.un.org/sustainabledevelopment/sustainable-development-goals/>.
- 468 2. The WHO. Global Health Observatory (GHO) data: HIV/AIDS 2019 [Available from:  
469 <https://www.who.int/gho/hiv/en/>.
- 470 3. UNAIDS. 90–90–90—An ambitious treatment target to help end the AIDS epidemic 2017  
471 [Available from: <https://www.unaids.org/en/resources/documents/2017/90-90-90>.
- 472 4. HIV/AIDS JUNPo. Stigma and discrimination 2003 [Available from:  
473 [http://data.unaids.org/Publications/fact-sheets03/fs\\_stigma\\_discrimination\\_en.pdf](http://data.unaids.org/Publications/fact-sheets03/fs_stigma_discrimination_en.pdf).
- 474 5. Chambers LA, Rueda S, Baker DN, Wilson MG, Deutsch R, Raeifar E, et al. Stigma, HIV  
475 and health: a qualitative synthesis. *BMC Public Health*. 2015;15:848.
- 476 6. Datta S, Bhattacharjee S, Sherpa PL, Banik S. Perceived HIV Related Stigma among  
477 Patients Attending ART Center of a Tertiary Care Center in Rural West Bengal, India. *J Clin Diagn  
478 Res*. 2016;10(10):VC09-VC12.
- 479 7. Kermode M, Holmes W, Langkham B, Thomas MS, Gifford S. HIV-related knowledge,  
480 attitudes and risk perception amongst nurses, doctors and other healthcare workers in rural  
481 India. *Indian J Med Res*. 2005;122(3):258-64.
- 482 8. Vorasane S, Jimba M, Kikuchi K, Yasuoka J, Nanishi K, Durham J, et al. An investigation of  
483 stigmatizing attitudes towards people living with HIV/AIDS by doctors and nurses in Vientiane,  
484 Lao PDR. *BMC Health Serv Res*. 2017;17(1):125.
- 485 9. Steward WT, Bharat S, Ramakrishna J, Heylen E, Ekstrand ML. Stigma is associated with  
486 delays in seeking care among HIV-infected people in India. *J Int Assoc Provid AIDS Care*.  
487 2013;12(2):103-9.
- 488 10. Ekstrand ML, Ramakrishna J, Bharat S, Heylen E. Prevalence and drivers of HIV stigma  
489 among health providers in urban India: implications for interventions. *J Int AIDS Soc*. 2013;16(3  
490 Suppl 2):18717.
- 491 11. Katz IT, Ryu AE, Onuegbu AG, Psaros C, Weiser SD, Bangsberg DR, et al. Impact of HIV-  
492 related stigma on treatment adherence: systematic review and meta-synthesis. *J Int AIDS Soc*.  
493 2013;16(3 Suppl 2):18640.
- 494 12. Wu S, Li L, Wu Z, Liang LJ, Cao H, Yan Z, et al. A brief HIV stigma reduction intervention  
495 for service providers in China. *AIDS Patient Care STDS*. 2008;22(6):513-20.
- 496 13. UNAIDS data. 2017 [Available from:  
497 [http://www.unaids.org/sites/default/files/media\\_asset/20170720\\_Data\\_book\\_2017\\_en.pdf](http://www.unaids.org/sites/default/files/media_asset/20170720_Data_book_2017_en.pdf).
- 498 14. National Aids Control Organization. 2016-2017 [Available from:  
499 <http://naco.gov.in/sites/default/files/NACO%20ANNUAL%20REPORT%202016-17.pdf>.
- 500 15. Madhya Pradesh State AIDS Control Society. [Available from:  
501 <http://www.mpsacsb.org/MPSACS-introduction.php>.
- 502 16. Bagcchi S. India passes law prohibiting discrimination against people with HIV/AIDS.  
503 *BMJ*. 2017;357:j1973.
- 504 17. Office of the Registrar General & Census Commissioner. Census of India 2011 [Available  
505 from: [http://censusindia.gov.in/2011-prov-results/data\\_files/mp/01Content.pdf](http://censusindia.gov.in/2011-prov-results/data_files/mp/01Content.pdf).
- 506 18. Economic and Human Development Indicators 2011 [Available from:  
507 [http://www.undp.org/content/dam/india/docs/madhyapradesh\\_factsheet.pdf](http://www.undp.org/content/dam/india/docs/madhyapradesh_factsheet.pdf).

- 1  
2  
3 508 19. Nebhinani N, Mattoo SK, Wanchu A. HIV Stigma and Specified Correlates in North India.  
4 509 Indian J Psychol Med. 2012;34(4):324-31.  
5  
6 510 20. Kumar N, Unnikrishnan B, Thapar R, Mithra P, Kulkarni V, Holla R, et al. Stigmatization  
7 511 and Discrimination toward People Living with HIV/AIDS in a Coastal City of South India. J Int  
8 512 Assoc Provid AIDS Care. 2017;16(3):226-32.  
9  
10 513 21. Nyblade L, Stangl A, Weiss E, Ashburn K. Combating HIV stigma in health care settings:  
11 514 what works? J Int AIDS Soc. 2009;12:15.  
12 515 22. Shah SM, Heylen E, Srinivasan K, Perumpil S, Ekstrand ML. Reducing HIV stigma among  
13 516 nursing students: a brief intervention. West J Nurs Res. 2014;36(10):1323-37.  
14 517 23. Pisal H, Sutar S, Sastry J, Kapadia-Kundu N, Joshi A, Joshi M, et al. Nurses' health  
15 518 education program in India increases HIV knowledge and reduces fear. J Assoc Nurses AIDS  
16 519 Care. 2007;18(6):32-43.  
17 520 24. Nyamathi A, Vatsa M, Khakha DC, McNeese-Smith D, Leake B, Fahey JL. HIV knowledge  
18 521 improvement among nurses in India: using a train-the-trainer program. J Assoc Nurses AIDS  
19 522 Care. 2008;19(6):443-9.  
20 523 25. Li L, Lin C, Guan J, Wu Z. Implementing a stigma reduction intervention in healthcare  
21 524 settings. J Int AIDS Soc. 2013;16(3 Suppl 2):18710.  
22 525 26. Aggarwal S, Lee DH, Minter WB, Fenning RT, Raja SK, Bernstein ME, et al. Another  
23 526 Generation of Stigma? Assessing Healthcare Student Perceptions of HIV-Positive Patients in  
24 527 Mwanza, Tanzania. AIDS Patient Care STDS. 2017;31(2):87-95.  
25 528 27. Landstedt K, Sharma A, Johansson F, Stalsby Lundborg C, Sharma M. Antibiotic  
26 529 prescriptions for inpatients having non-bacterial diagnosis at medicine departments of two  
27 530 private sector hospitals in Madhya Pradesh, India: a cross-sectional study. BMJ Open.  
28 531 2017;7(4):e012974.  
29 532 28. Sharma M, Joshi R, Shah H, Macaden R, Lundborg CS. A step-wise approach towards  
30 533 introduction of an alcohol based hand rub, and implementation of front line ownership- using  
31 534 a, rural, tertiary care hospital in central India as a model. BMC Health Serv Res. 2015;15:182.  
32 535 29. Ruotsalainen JH, Verbeek JH, Marine A, Serra C. Preventing occupational stress in  
33 536 healthcare workers. Cochrane Database Syst Rev. 2015(4):CD002892.  
34 537 30. Ganczak M, Barss P, Alfaresi F, Almazrouei S, Muraddad A, Al-Maskari F. Break the  
35 538 silence: HIV/AIDS knowledge, attitudes, and educational needs among Arab university students  
36 539 in United Arab Emirates. J Adolesc Health. 2007;40(6):572 e1-8.  
37 540 31. Chaudoir SR, Dugan AG, Barr CH. Measuring factors affecting implementation of health  
38 541 innovations: a systematic review of structural, organizational, provider, patient, and innovation  
39 542 level measures. Implement Sci. 2013;8:22.  
40 543 32. USAID. Can we measure HIV/AIDS-related stigma and discrimination?  
41 544 Current knowledge about quantifying stigma in developing countries 2006 [Available from:  
42 545 <http://www.policyproject.com/pubs/generalreport/Measure%20HIV%20Stigma.pdf>.  
43 546 33. Doda A, Negi G, Gaur DS, Harsh M. Human immunodeficiency virus/acquired immune  
44 547 deficiency syndrome: A survey on the knowledge, attitude, and practice among medical  
45 548 professionals at a tertiary health-care institution in Uttarakhand, India. Asian J Transfus Sci.  
46 549 2018;12(1):21-6.  
47 550 34. Mazmanian PE, Davis DA. Continuing medical education and the physician as a learner:  
48 551 guide to the evidence. JAMA. 2002;288(9):1057-60.

- 1  
2  
3 552 35. Davis DA, Thomson MA, Oxman AD, Haynes RB. Changing physician performance. A  
4 553 systematic review of the effect of continuing medical education strategies. JAMA.  
5 554 1995;274(9):700-5.  
6  
7 555 36. Batey DS, Whitfield S, Mulla M, Stringer KL, Durojaiye M, McCormick L, et al. Adaptation  
8 556 and Implementation of an Intervention to Reduce HIV-Related Stigma Among Healthcare  
9 557 Workers in the United States: Piloting of the FRESH Workshop. AIDS Patient Care STDS.  
10 558 2016;30(11):519-27.  
11  
12 559 37. Pulerwitz J, Oanh KT, Akinwolemiwa D, Ashburn K, Nyblade L. Improving hospital-based  
13 560 quality of care by reducing HIV-related stigma: evaluation results from Vietnam. AIDS Behav.  
14 561 2015;19(2):246-56.  
15  
16 562 38. Andersson GZ, Reinius M, Eriksson LE, Svedhem V, Esfahani FM, Deuba K, et al. Stigma  
17 563 reduction interventions in people living with HIV to improve health-related quality of life.  
18 564 Lancet HIV. 2019.  
19 565 39. Safreed-Harmon K, Anderson J, Azzopardi-Muscat N, Behrens GMN, d'Arminio Monforte  
20 566 A, Davidovich U, et al. Reorienting health systems to care for people with HIV beyond viral  
21 567 suppression. Lancet HIV. 2019;6(12):e869-e77.  
22  
23 568 40. Srithanaviboonchai K, Stockton M, Pudpong N, Chariyalertsak S, Prakongsai P,  
24 569 Chariyalertsak C, et al. Building the evidence base for stigma and discrimination-reduction  
25 570 programming in Thailand: development of tools to measure healthcare stigma and  
26 571 discrimination. BMC Public Health. 2017;17(1):245.  
27  
28 572



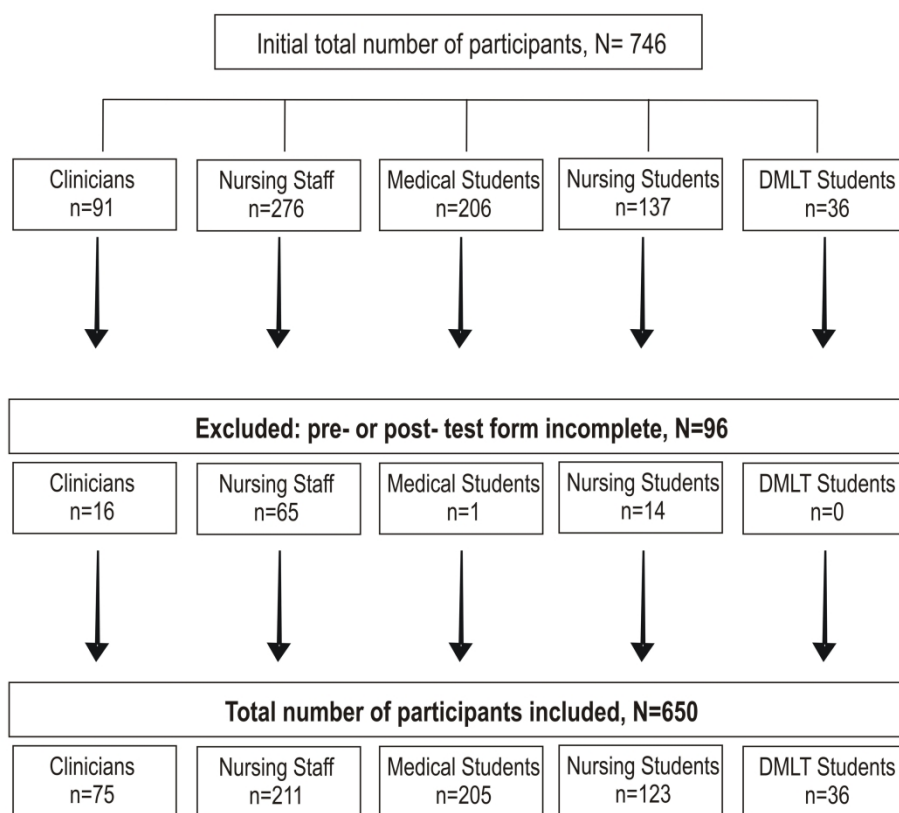

Figure 1 Inclusion and exclusion criteria of the study participants Intervention

125x111mm (600 x 600 DPI)
